# Supplementary material for: Distinctive ligand‐binding specificities of tandem PA14 biomass‐sensory elements from Clostridium thermocellum and Clostridium clariflavum
Source: PubMed Central journal article supplement — Proteins. 2019 Jun 25;87(11):917–30. doi: 10.1002/prot.25753 (PMC6852018; doi:10.1002/prot.25753), 2019-06-25
Supplement: PROT-87-917-s001.pdf [file PROT-87-917-s001.pdf]

**Appendix S1.** FASTA sequences used during the analysis of the evolutionary relationships of  $\sigma^I$  factors from cellulolytic clostridia shown in Figure 6.

```
>C_thermocellum_Clo1313_2174_ADU75214_SigI1_RsgI1_CBM3
GTGGAAGTCCGGAAAATTAATACCCATAACAGGGAGAAAAAACTGGATGATATAGTCTATGACGACTTTA
TTTCTACCCTTAGACAGATAAAGGAAGGAAATCATCAGCTCAGAGAAGAGTTTATATCGGAATATAAACC
CTTCATTTTGAAAGTTACCTCAAATGCCACGGGAAAATATATCGACACCCGCAACAGTGATGAGTTTAGC
ATTGCATTGTCCGCGTTTAATGAAGCAATTGATAAATTTGACATCGAGAAAGGTTATAATTTCTTTCTCT
TTTCTGAGCAGGTAATAAGAAGGCGCTGATTGATTATTCAAGAAGCAACAAAGATGATAAGGAATATCC
TTTTTCATTTTTTGGATGACGAATATTTTTATAACAATGAAAACTTTTATCCAAGTCGTATATTGGATTT
GAAGATATTGAGGCAAGGGAAGATATTGAAGAATTAAGAAGAAGCTTCAGGAATTTGGCATAACATTTTC
TCGATTTGGTGTAAATGTTCCGAAGCACAGGGATTCAAGGCAGCTTTGTATAAGGTTGGCCAAGATGCT
GGCTGAGGATGAGCAAAATGTACAATGCATTAATGAAGAATAAAAACATACCCAGAAATGAATTAAAAAAG
AAAGCCAAGGTTACGGGAGGACCATAGGCAATAATAGAAAATATATTATAGCGCTTTGTTTAATTTTCA
GAAGTAACCTGAATCTTTCAAAGAGATATTTGGAGTATTATACTATGGACGGAGGAAAGTGA
```

```
>C_thermocellum_Clo1313_1961_ADU75008_SigI2_RsgI2_CBM3
TTGATTGATTTGTTTTCCCCTAAGGGAAAAAAGATACAGTTAGTACAACATAAAGATAAATCCTTCG
AGGACGGTATCGTGAATATTATAAATAAAATAAAGGCCGGAGACAAATTTATTAAGGGAAGAGTTCATCAA
CAGCTATACACCTTATATTATCAGAACAGTCTCCAATTTGACCGGCAAAATATGTTGATGTTGAAAACAGT
GATGAGTTCAGCGTGGGTCTTGCCGCTTCAATGAAGCTATTGACAGCTTTGATGAAGGAAAAAACATGT
TTTTCTTTAAATTTCTCGACTTTGGTAATAAAAAGAAGACTTACCGATTACGCTCGTCACAATAAAAAACA
TTGCCATGTATATCCTTTTACATATTTTGAAGATAAAAACAACAGCTATTTTGAACAAATACATTTAAAA
AGTGAAATTGATTTACAAAACACATATGAAATCAGCAGAGAAATCGAGCTATATGAACAAAAGCTTCGGG
ATTTTGAATCAGCCTTGAACATCTGGCCAAATGCGCACCAAAGCACAAAGATTCAAATCCCTGTGTAT
AAAGATTGCCAAAGTAATTGCCGACAACAAGAAGACTTTTCAGCAAATTTGAGAGAACCCGAAACATACCG
AAAACAGAACTGTTGAAATTAAGATAAAATAAAAAGACAATTTGAGAGAAACCGTACATTCATCATAG
CCGCTGCTTTGATCTTTGGAAACGACTTCAACTTACTCAAGGACTTTCTAGACATCTCAGAACCAGGAGG
TGACAACATTGAACGGAGCACAAAATAA
```

```
>C_thermocellum_Clo1313_1911_ADU74962_SigI3_RsgI3_2xPA14
TTGCATGGGTTGTTTTGTAAATAAAAAGAAGAATGACACTGGTTCTACAGCACTTGTTCCTTAAAAAGATTC
AAAGCGGGGACACAAAACCTTAAGGAAGAATTTATTAAGACAATGTTCCGTATATTATAAGAACGATTTTC
AAATATACTTGGGATAGTTGTGGATGACAGAAACAGTGAGGAATTCAGCATTGGACTTGCAGCTTTTAAAT
GAAGCCATTGACAGATATGATGCCGATAAAAACGGCAATTTCTATACCTATTCTTTTGTAGTTATAAAAA
GCCGCTTATATGATTTTATAAGAAGAACAAGGAAACACAACAATGTTTTGCCTTTTTTCATATATTGAAGA
ATCAACTCGGGTGGACGAAAGATTTATTGATGTCCGATGCCAGCGGTCAATTCGAAAAAATTGAGGTAAGG
CAGGAACTGGTCAGCTTTGAGAAAAGCTTAAAGGAATTTGGAATTTCCCTGGAAGACTTGGTGTATCCT
CTCCGAAACATAAGGATTCAAGGCTTTTATTGATAAAAATCGCAAGAATAATTGCTGATGATGACAATAT
GTTTCAGAAAGCTGGTCGAAAAGAAGTACATACCCATGAAAGAAGTATTAAGCCGAATAAAAGTAAATCAC
AAGACGATTCAGAGGAACAGGAAATTTATAATTGCTGTCAGCCTGATTTTACGAAGTAATCTATACGATC
TCAAAGAGTATGTGCAGGGCTTCGAAAGGGAGGAAAGTATCATGGATAA
```

```
>C_thermocellum_Clo1313_1818_ADU74874_SigI4_RsgI4_CBM3
ATGCTAAACGTCCAGCTGAAAATTTTCTGCCACGCCGATTAATTTTTTTTAGAGGTGGTATATTTGTTTG
AACCCAACTTGATATATGGAGTAAAAAAAAGGGAGAAAAAGTCTCGCTCTGACTCTATAAATCACATTAT
TATAAAGATAAAAAACGGAGATATCGAATTAAGGAAAAATTTATAAAAAAGTATAAACCGTATTTATTA
AAAATTATATCCAGCACCTTTGGAAGGTATGTTGATCCAGAGGTGAGCGAGGAATACAGCGTAGGACTTA
TGGCTTTCAATGAAGCTATAGATGGGTTTAAATCCTGAGATAAATGGCAATTTTACGAACTACTGCAATAT
GGTGGTCAATCATAGAATTTATTGATTATATAAGAAAAACAAGAAATACAGCAATGTCATACCTTTCTCA
TATTTTGAAGAAAGAAACGATTTTCGAAGAAAAATATCTCGTCTCCGACAGCCATTACCTTTATGAAAACA
```

TAGAAGTAAAAGAGGAAATTCTGCAATTTGAACAGCAGTTGAAACAGTTTGGGATAACCCTTGAAGACTT  
GGTTATGAACTCACCGAAACACAAGGACTCAAGGGAACCTTTGCATCAGCATAGCCAGAATTTTATCAGAA  
AATGACAAGCTGTTTGAAGAAGATGATTGAAAAAATGTATTCCCCTGTCTGAATTAATGGGATTGGTTA  
ATGTCCATCGGAAAACCGTGGAAAGGAACAGGAAATTCATTATTGCAGTGAGTTTGATTTTAAAGAAGTGG  
TCTTGATGAGATAAAGCAGTTTTTTCAGAGCATCTGAGGAAAGGAGGGAAAAATAA

>C\_thermocellum\_Clo1313\_0986\_ADU74054\_SigI5\_RsgI5\_CBM42

ATGCTATTTGTTTCTGCTATTATAGATTATGCCGGTGAAACAGCAACTCACATTGTTGAAAAAATCAAAA  
ACGGGGACAAGCATTTAAAAGAAAAGTTCATTAAAGATTATATCCCCTTTATATTAATATTGTTTCAAG  
CTTCTACTCTTCAAAAACAGGAGATCTAAAAAGCAGCGATGAATATAGTATTGGCTTGATGGCCTTTAAT  
GAGGCTATCGAAAAATTTGATGTTAATAAAAGCAAAAGTTTTCTCAAATTTGCAGAAATGGTTATAAAAA  
AGCGAATGATAGACTATTTTAGAAAAACATCCTCAATCGGCAGAAAAGAAATCCCTTTTTCTATTTTAA  
CAGCAATAACGAACTGAATTTAGAAAAAAAATAAATAACCTTGACATCGAAGAGGAATTTAACAGTTAT  
GAATTTATTTGCGAATTAAGGGACTTTTTCCAAAAAAGTTGAAAGCTTTGGACTTAGCATAAACAATTTGC  
CTGATTACATGCCCAAACACAAAGACTCAAGAGAAATGTGCATAAACATAGCCAAAAAATAGTTGAAAA  
CAAGAGTATTTTTGACAAATTAAGACAAAAAAGTACATACAGATGAAAGAGCTTTCCAAAAAATTTGAT  
GTTTCATCCAAAGACCGTTGAAAGAAACAGGGCTTTTTATCATATGTTTATGTATATTATTTGATAATGATT  
ATGGAACTTTAAATCGTATTTAAATAAAATATTTTAA

>C\_thermocellum\_Clo1313\_2778\_ADU75762\_SigI6\_RsgI6\_GH10

GTGGATTGGCATTTCACAGGTACGAACGACGACAGGGAACATACAAAAAGGATTATTATAGAGTATCTGA  
ACAGAATAAAAGCCGGGGATGATTCTGCAAGGGAAGAGTTTATCCTGAGGTTTAGGCCTTTTATATTTAA  
ATTGGTGTATAAGGCGACTGACAGGCATGTTGAGCCGGAAAACAGTGAAGAATACAGCGTTGCATTATTG  
GCTTTCAATGAAGCCATCAATGCTTATGATGAAGAGAAGCATTCTAACTTCCCTTGTTTTCTCAGAACAGG  
TTATTAATAGAAGACTTATTGACTATAAAAGAAAAAATCATAAGAATAAAATGGTTTTATCCTTTTTCTTA  
CTTTGAAAACGAAGATATCAAACCTTGAAAGAACTCTTTCGGATGCTGACGGCAACAATGCAATTGAAAGA  
TTGGAATTTACGGACGAGATTAGACTTTTCAAATCTGAGCTGGCCTCCTTTGATATAACTTTTAAAGGATT  
TGCTCTCCTGTACTCCAAAGCACAGAGATTCGAGAGAGCTTTTGATAAATATTGCAAAAAAATTTGCAAG  
TAATGACGGGCTTTATGAAAAGCTAAAAAAAACCAAAAAGTTGCCACATTGGAAGCTGTTGAACTGGCA  
AAAGTTAGCAGAAGGACTATAGAAAGAAATAAAAAATATATAATTGCAGTAAGCTTGATATTAAGGAGCA  
ACCTCGAAATCTTCAAGGAGTATGCTGCAGGTATCCAGGAAAAGGAGGTGGATTTGCGGTGA

>C\_thermocellum\_Clo1313\_0104\_ADU73201\_SigI7\_RsgI7\_UNK

ATGTATTCTGTTACTATAAACCAAGAGTTGAGGCAATAAAAAACAACGAAGAGGAAATAAATCTTTTTG  
TAGAAGAGTATAAACCATTTCATAGCAGCCTGCACGCAGAAGGTGGTTGGACGCTATGTTGCCTACGGACA  
GGATGATGAACTTAGCATTGCTCTGATGGCTTTTTGTGGAGGCTATCCGTTCTTATGACGTCTCAAAGGC  
AATTTCTTTCTTCTCCAGAATGTTATTAAGAAGAATTATAGATTATTACAGAAAAGAAAAGAAAC  
ACAGCGTGGTTGTTAATAAACGGGCACCTCGAAGACGAAGAAGAGGAGACCGACCTTGGCATTGCCAT  
GTCCATTGATAAGTACTCGGAAGAAGAAATCAGCGAGTACAGAAGGCTCGAGCTTGAACAGTTGAAAAAA  
GAGCTTAAAGAATGGGACATATCTTTTTTTTGATTTGGTTAACATATCACCAAAGCATAAAAGGACCAAAA  
AGATTTATTCGAAAATAATAAAGTTTTGTCCTTTCAAGACCGGATATTATGGAGAAAATAAAGCAAAAGAA  
ATATTTACCGTTGCAGAGATAGAGCAGAGCCTTAAAATACCTCGGAAAACAATTGAACGGGCTCGAAAA  
TATATTATAACAGTAGTGATAATATTTACCGGAGATTACGAGTTTATTAGGGATTACGTAAACTGGGAGG  
TGGAATAA

>C\_thermocellum\_Clo1313\_0525\_ADU73610\_SigI8\_RsgI8\_UNK

TTGATAAATTTAGGCTCATAACAACCTTACTCCGGCACGAGAAAGACTCTTTTTTTGGAAATCATAAGAAGAA  
TCAAAGATGGCGACAATTTACTGAGAAACAAGTTTATTGACGATTTTAAACCATTTATTTTAAAATGCGT  
ATCTCAACTGGTAGGTAAAAAAAACGACTTGACTCAGAGCGACGAATACAGTATTGCCCTCATTGCCTTT  
AATGAAGCTATTGAGTCTTATGATTTAGATAAAAAAACAAGTTCGTCAGTTTTTCGAAACAGGTAATAA  
AAAGGCGGCTTATAGATTACTTAAGAAGTACAAAAAGAACAATGTAGCCGTTCCGTTTTTCATATTTCAA  
CGATTGTAATAGCAGCTTTAATGACAGCAGCACCGCAATTTTCAAGAAAAGTTTCTATATGACAGGAAT

TCGGACTACAGCATTGATTTTGAAGCCAGAGAAGAAATTA AAAAATCTGGAATTA AAAAATATGTGAATATA  
AAATGACCATTGAAGATTTGATTGAATGTTCCCCAAAGCACCGGGATACTATAATTTTATGTCTTAATGT  
GGCAAACATTATCATAGAGGATGAATCATTGTACCAAATGTTCAACAAAAGGAAAACCTCTCCCATATAAA  
GAATTGACCGAACGTTTTAATCTATGCCGCAGGACTCTTGAAAAGAACAGAAAATTTATTACCGCTATGG  
TTCTTATACTTAAAAGCGACCTTGAGGTATTAAAGAAATACATATATGATACATTAGGACGGTGA

>C\_straminisolvens\_GAE88571\_SigI1\_like\_RsgI1\_CBM3

TTGGAGGTCGGGAAAATCAATAATGTTATCAAAGAAAAAAAACCTGGATGAGACAGTCTATGATGACTTTA  
TTTCTACCCTTAAACAAATAAAAAGAAGGTAACAAACAGCTCAGAGACGAGTTCATATCCGAATATAGACC  
ATTCATTTTTGAAAGTTACGTCAAATGCGACGGGAAAATATATTGATACCCGCAACAGTGACGAGTTTAGC  
ATTGCTATGTCTGCATTCAATGAGGCAATCGATAAATTCGATATCAGCAAAGGTTATAACTTCTTTCTTT  
TTTCTGAACAGGTAATTAAGAAGACGGCTGATTGATTATTCAAGAAGCAATAAGGATAATAAGGAGTATCC  
TTTTTCGTTTTTTGATGATGAATACTTTTATAATGATGAGAACTTTTATCGAGATCTTATACTGGGTTT  
GAAGATATAGAGGCACGGGAGGATATCGAAGAATTA AAAAGCAAGCTAAAAGAATTTGGCATAACTTTCC  
TTGATTTAGTTCTAAATGTCCCAAACACCGGGACTCAAGGCAGTTATGTATAAAGCTGGCCAAGATGCT  
GGCGGAGGATGAGCAAATGTATAGGGCGTTAATGAAGAATAAAAAGCATACCCAGAAATGAGCTAAAGAAG  
AAAGCCAAAGTCCACGGAAGGACTATAGGAAATAATCGAAAGTATATTATAGCTCTTTGCTTAATTTTAA  
AAAGCAATCTATATCTCTCAAAGAGGTATCTGGAATATACTATGGAGGGGGGAAAGTGA

>C\_straminisolvens\_GAE89281\_SigI2\_like\_RsgI2\_CBM3

TTGATTGATTTCTTTTCCCCTAAGGGAAAAAAGACACTAACAAAGATAAAAACCTTTTGAGGACGATATTG  
TCCTTACTATAAATAGAATAAAGACTGGAGACAAATTATTAAGAGAAGAGTTCATCCGTAGTTACACACC  
TTATGTCATTAGAAGTGTCTCTAATTTGACCGGCAAATATATTGACATTGAAAACAGTGATGAGTTTAGT  
GTTGGGCTTTCTGCTTTTAATGAAGCCATTGACAGCTTCGATGAAGAAAAAACATATTTTTCTTTAAAT  
TCGCAACATTGGTAATAAAAAGAAGGCTTACCGATTATGCTCGTCACAATAAAAAGCATTGCCATGTGTA  
TCCTTTTACGTATTTTGAAGATAAAAACAATAATTATTTTGAGCAAATACACTTGAAAAGCGAAATTGAC  
TTACAAAGTACATACGAAATAAGAAGAGAAATCGAACTATACGAACAAAAGCTTCGGGATTTTGGAAATCA  
GCCTTGAGCATCTGGCTAAATCCGCGCCAAAGCACAAGGACTCAAAAATACCTATGTATAAGGATTGCCAA  
AGCAATTGCCGACAACAAAGAGCTTTTTCAGCAAATTTGAAAGAACTCGAAACATACCGAAAACAGAATTG  
TTGAAATTACTTAAAATAAATAAAAAGACAATTGAGAGAAATCGTACATTCATTATAGCTGCTGCTTTGA  
TCTTCGGAAATGATTTCAACTTACTCAATGACTTTCTAGACATCTCAGTGCCAGGAGGTGACAACATTGA  
ACGAAGCACAAAATAA

>C\_straminisolvens\_GAE88883\_SigI3\_like\_RsgI3\_2xPA14

TTGCATGGGTTGTTTATAAACAAAAAGAGAATGTTATTGATACTAGCTCTACGGCGCTTGTTATTAAAA  
AGATTCAAAACGGGGACATAAGACTTAAGGAAGAGTTTATTAAGACAATGTTCCGTACATTATAAGAAC  
GATTTCAAATATACTTGGGATAGTGGTGGATGACAGGAACAGTGAAGAATTCAGCATTGGACTTGCGGCT  
TTTAATGAAGCTATTGACAGATATGATTCGGAAAAAACGGCAATTTTATAACATATCTTTTATGGTTA  
TCAAAGCAGGTTATTTCGATTTTATAAGAAGAAACAAGAAACACAGTAATGTTTTGCCTTTTTTCGTATAT  
TGAACAATCGACTCGGGTAGAAGAAAGATTATTGACATGTGATTCAAGCGGGCAATTCGAAAAAATTGAG  
GTAAGGCAGGAGCTTACCAGCTTTGAAAAAACTTAAAGGAATTCGGAATTTCACTGGAAGACTTGGTAT  
TATCCTCTCCGAAACATAGGGATTCAAGGCTCTTATCAATAAAAATCGCCAGGATAATTGCTGATAATGA  
CGACATATTCAAAAATTTGGCCGAGAAGAAATACATACCCATGAAAGAGATATTAAAGCTAATAAAGGTA  
AACCACAAGACGATCCAGAGAAACAGGAAATTCATAATTGCTGTTAGCCTGATTCTACGAAGCAATTTAT  
ATGATCTTAAGGAGTATGTACAGGGCTTCGAAAGGGAGGGGAAAGTATAATGGATAA

>C\_straminisolvens\_GAE88373\_SigI4\_like\_RsgI4\_CBM3

TTGTTTGAGCCCGACTTAATGTATGGAATAAAGAAAAGAGGAAGAAAGTCTCGCATTGATTCTATCAATC  
ATATTGTCATACAGATTA AAAATGGAGACGTGCAATTAAGGAAAAATTTATAAAGAAATATAAACCGTA  
TTTATTAAGATTATATCCAGTACTATCGGAAGATATGTTGATCCGGAGGTTAGCGAGGAATATAGTGTA  
GGGCTTATGGCTTTTAATGAAGCTATAGATGGATTTAATCCCGATATAAATGGGAATTTACGAATTTAT  
GCAATATGGTGGTTAACCATAGAATTATTGATTACATAAGAAAAAATAAGAAATACAGCAATGTCATACC

TTTTTCGTACTTTGAAGAAAGAAACGATTTTCGAAGAAAAATATCTAGTCTCCGATAGCCATTACCTTTAT  
GAGAATATAGAAGTAAAAGAAGAGATACTGCAATTAGAACAGCAGTTAAAACAGTTTGGAAATTACCCTTG  
AGGATCTGGTGGTGAATTCACCGAAACATAAGGACTCAAGGGAACCTTTGTATCAATATAGCCAGGGTTTT  
GGCAGAAAATGATAAGTTATTTGAAAAATGCTTCGTAAAAAATGCATCCCGTTATCTGAATTAATGGGC  
TTTGTAGTGTTCACCGAAAACTGTAGAAAGGAACAGAAAAGTTCATTATAGCGGTGAGCCTAGTTTTAA  
GAAGCGGCCTTGATGAGATAAAGCAATTCCTCAAAGAACATGAAGAAAGGGGGGACAATAA

>C\_straminisolvans\_GAE89174\_SigI5\_like\_RsgI5\_CBM42

ATGCTATTTATTTCTGCTTTTATTGATTATACCAGTGAGACAGCAACCCACATTGTTGAAAAAATCAAAA  
ACGGTGACAAACATTTAAAAGAAAAGTTTCATAAAAGACTATATTCGGTTTTATATTAATATCGTTTTCAGG  
CTACTATACCTCAAAGCGGTAGATTTAAAAGCAGTGACGAATACAGCGTGGGACTGATGGCATTTAAT  
GAAGCTATTGAAAAGTTTGACATTAATAGAAGCAAGAGCTTCCTCAAATTTGCTGAAATGGTAATAAAAA  
AGAGAATGATAGACTATTTTAGAAAAACATCATCAATCGGTAGAAAAGAAATTCCTTTTTTCATACTTTAA  
CAGCAATAATGAACTGAATTTAAGAAAAAATAAATTCCTTTTGATGTTGATCAGGAATTAAGCAGTTAT  
GAATTCATTTGCGAATTAAGGATTTTTCCAGACAGCTAGAAAGTTTTGGATTAAGCATAAATAACTTAC  
CTGATTATATGCCTAAGCACAAGGACTCAAGAGAAATGTGTATAAACATAGCCAAAAAATAGTTGAAAA  
CAAAAATATTTTTCGATAAATTGAAAACAAAAAAGTACATACAGATGAAAGAACTTTTCGAAAAATAATTGAT  
GTTTCATCCAAAGACTGTTGAAAGAAACAGGGCATTATCATATGTTTATGTATATTATTTGATAATGATT  
ACGGAAACTTCAAAGCATATTTAAATAAAATAGTTTAA

>C\_straminisolvans\_GAE90492\_SigI6\_like\_RsgI6\_GH10

GTGGATTGGCATTCTCAGAGTATCAATGACGACAGAGAACGCACGAAAAAGATTATTATAGAGTTTCTGA  
ATAAAATAAAAGCCGGGGATAATTCTGCAAGAGATGAATTTATCCTAAGGTTTAAGCCTTTTATACTAAA  
ATTGGTATATAAGGCAACTGATAAACATGTTGAGCCGGAAAAACAGTGAAGAGTACAGCGTTGCTTTATTG  
GCCTTCAATGAAGCTATCAATGCTTATGATGAGGACAAACATCCGAACTTCCTGGTATTTTCAGAACAGG  
TTATTAATAGAAGACTTATTGACTATAAAAGGAAGAATCATAAAAACAAAATGGTTTTATCCCTTTTCTTA  
CTTTGAGAACGAAAACATCAAGCTTGAAAGAACTCTTCCGGATGTTGATAGCTCAAGCGCAATTGAAAGA  
CTGGAATTCACAGACGAAATTAGACTTTTTAAGTCAGAATTGGCTTCTTTCAACATATCTTTTAAGGATT  
TACTGTCTTGTACTCCCAAACACAGAGATTCGAGAGAGCTGTTAATAAATATTGCCAGAAAAGTAGCAGG  
AAATGACGGGCTGTATGAAAAGCTTAGAAAAACAAAAAGCTTCCTACATTGGAGCTATTGAAACTGGCA  
AAAGTTAGCAGGCGGACTATAGAAAGGAACAAAAAATATATAATTGCAGTAAGTTTGATATTAAGAAGCA  
ACCTCGAAATCTTCAGGGAGTATGCTGCGAGCAGCAAGGAGAAGGAGGTGGATTTGCGGTGA

>C\_straminisolvans\_GAE90135\_SigI7\_like\_RsgI7\_UNK

ATGTATTCTGTTACTATAAACCAGAGTTGAATTAATTAATAATGACGAAGATAAAATAAATATTTTTG  
TAGAAGAATACAAACCGTTTATTGCAGCCTGCGCACAAAAGGTGGTAGGGCGCTATGTTGCCTATGGACA  
GGATGATGAATTGAGCATTGCGCTGATGGCTTTTGTAGAGGCTATCCGTTCTTATGACGCCTCAAAGGGC  
AATTTTCTTTCTTTTCCAGAAATGTTATCAGAAGAAGAATTATAGATTATCAAAGAAAAGAAAAAAGC  
ATAGTACAGTTGTTAATAATAAATGGGTACGTTGAGCATGAAGAAGAGGAAACTGACCTTAGCATTGCCAT  
GTCCATCGAGAAGTACTCAAATGAAGAGATCAGTGAATACAGAAGGCTTGAACCTTCAACAGTTGAAAAAG  
GAGCTTGAAAAATGGGATATATCCTTCTTTGAACTGGTTAACATATCTCAAAGCATAAAAAAACAAGA  
AGATTTATTGCAATATAATAAATTTCTTCTGTCCAGACAGGATATTATGGAAAAAATAAAGCAGAAGAA  
GTATTTGCCTATAGCAGAGATCGAAAAGAACCTGAAAATACCTCGGAAAACGATTGAAAGGGCTCGAAAA  
TATATTATAGCAGTAGTAATAAATTTTACCGGAGATTACGAATTTATTAAGGATTACGTAAACTGGGAGG  
TGGAATAA

>C\_straminisolvans\_GAE90430\_SigI8\_like\_RsgI8\_UNK

TTGATAAGTTTTAGTTTCGTACAACCTTGTTCGGCATGAAAAGACTCTTTTTTAGATATTATAAAAAGAA  
TCAAAGATGGCGACACGCTACTTAGAAATAAGTTTATTGATGACTTCAAACCCTTTATTCTAAAATGCGT  
ATCTCAATTGGTAGGTAACAAAAACAACCTTGGCTCAAAGCGACGAATACAGCATTGCCCTAATTGCCCTC  
AACGAAGCTATTGAGTCCTATAACTTAGATAAAAAAACAAGTTTGTGTCAGCTTTTCAAAGCAAGTAATAA  
AAAGGCGGCTTATAGATTATTTGAGAAGCACAAAAAGAACAATGTAACGTGTCCTTTTTTCATATCTTAA

GGATTATAACACCGGGTTTTATGAGCACAGTACCAGTAACTTCGAAGAAAAGTTTTCTATATGATAAAAAAC  
TCGGACTATAGCATTGATTTTTGAACTAGAGAAGAAATTAAGAATTTTCGAGCTAAAAATATATGAATATA  
AAATGACCATTGAAGACCTGATTGAATGTTCCCCAAAACACCGCGATACTATAATCTTATGCCTCAAAGT  
AGCAAATATTATCATAGAAAACGAATCATTATATCAATCATTTCAGGGAAAGAAAAATTTCTCCCGTATAAA  
GAGTTGACCGAGCATTTTAACTTATGCCGCAGAACTCTTGAAAAAACAGAAAATTCATTATTGCCATGG  
TTTTTATACTTAAAAGCGATCTTGAGGTATTGAAAAATATATATATGATACATTAGGACGGTGA

>C\_straminisolvens\_GAE90074\_SigI9\_RsgI9\_CBM44

TTGCAGCTTAGAGACAGGTTTTATAAGTGAAAGTATGCCTTTTTATTATGAAATCACTACATAAAAATTTTAA  
AAAGACATATTGATATTTAAAATGATGAGGAATTCAGTATAGGCTTGTCTGCTTTTAATGAAGCAATAGA  
TCATTATGACCTGTATAGAAAAGGTGACTTTTACAGGTATTTCGTATATTATGATTAAGCATAGGATCATT  
GATTATTTAAGAAGTACAAAAGAAACGGTAAACTATAACCATTTTCAAGTATTGAGGATAATGAATACT  
TTGATCAAAGATACCTTACTTCTAATATAAATAATCAATACGAAATAGTGAGGCTAAAAGAAGACATACT  
GATTTTACAGCAGAATTTAATGGAGTTTGGCATAACATGGGATGATTTAATAAACAATTCGCCTATGCAC  
AGGGATACCAGACGTCTATGTATAAGAATAGCAAAAGAGATATTGGAAAACGAGGATTTATATACAAAAT  
TTATAAATACCAAGAAAATTCCTCGTTCTCAATTGGTAGAACGGCTTAAAATTCATCGGAGAACTATAGA  
AAATCACAGAATATTTATAATCGCAATTTGCCTGATTTTTAAAAGTAATCAGGATGAGTTGAAAGCATT  
CCCATTCATTTGAAGAAAGGGGAATTCATTATGA

>C\_sp\_Bc\_iso\_ODM26107\_SigI1\_like\_RsgI1\_CBM3

TTGAAGGTCCGGAAAATCAATAATGATAATAAAGAAAAAACCTGGATGAGACAGTTTTATGATGGCTTTA  
TTTCTACCCTGAAACAGATAAAAAGAAGGTAATCAGCAACTAAGAGATGAGTTCATATCCGAATATAGACC  
ATTCATCTTGAAAGTTACGTCAAATGCGCTGGGAAAATATATTGATACCCGCAACAATGACGAGTTTAGC  
ATTGCTATGTCTGCATTTAATGAAGCAATTGACAAGTTCGATACCAGTAAAGGTTATAACTTCTTTCTTT  
TTTCGGAACAGGTAATTTAAAAGACGGTTGATTGATTATTCTAGAAGTAATAGGTACAATAAGGAATACCC  
TTTTTCTTTTTTTGATGATGAATATGTCTATCATGATGAAAAATTTATGTCCAGATCCTATATTGGATTT  
GAAGATATTGAGGCCCGGGAAGATATTGAAGAATTTAAAATAAGCTGAAGGAATTTGGCATAACCTTTC  
TTGATTTGGTATTGAATGTTCCAAAGCATAAGGATTCGAGGCAATTATGCATAAAGTTGGCCAGTATACT  
GGCTGAGGATGAGCATATGTATAAGGCATTGATGAAGAATAAAAGCATAACCCAGAAATGAATTAAGAAG  
AAAGCAAGAGTCCATGGAAGGACCATAGGTAATAATAGGAAGTATATTATAGCTCTTTGTTTTGATTTTAA  
AAAGCAATCTTAACCTTTCAAAGAGATATCTAGAATATACTATGGAGGGGGGAAAGTAA

>C\_sp\_Bc\_iso\_ODM25887\_SigI2\_like\_RsgI2\_CBM3

TTGATTGATTTATTTTCCCCTAAGGGAAAAAAGGATACTTTTTAAAGATAAATCCTCTGAGGACAATATTG  
TCCTTACTATAAATAGAATAAAGGCTGGAGACAAATTATTAAGAGAAGAGTTTATTAATAGCTATACACC  
TTATGTTATTAAGACAGTCTCTAATTTGATCGGCAAAATATATTGACATTGAAAACAGTGATGAGTTTAGT  
GTGGGCCCTTCTGCTTTTAAACGAAGCTATTGACAGTTTGGATGAAGAAAAGAATTTATTCTTCTTTAAAT  
TCTCCACATTTGGTAATAAAAAGAAGGCTTACAGATTACGCTCGCCACAACAAGAAACATTGCCATGTGTA  
TCCTTTTACATATTTTGAAGACAAAACAATAATTATTTTGAACAAGTACATTTGAAAAGCGAAATTGAT  
TTAGAAAGTAAATTTGAGATTAGCAAAGAAATCGAACTCTACGAACAAAAGCTTCGGGAATTTGGAATCA  
GCCTTGAAAATCTGGCTAAATCCGCACCAAAGCACAAGATTCGAAGTATCTATGTATAAAGATTGCGAG  
AGTAATTGCCGATAACAATGAGCTTTTGGAGTAACTTGAAAGAACTCGCAATATACCGAAAACAGAATTG  
CTGAAGCTACTAAAGATAAACAAAAAGACAATCGAGAGGAATCGTACATTCATTATAGCTGCTACTTTGA  
TCTTCGGAAATGATTTCACTTACTTAAGGACTTTCTAGACATCTCAGAGCCAGGAGGTGACAACATTGA  
ACGAAGCACAAAATAA

>C\_sp\_Bc\_iso\_ODM25838\_SigI3\_like\_RsgI3\_2xPA14

TTGCATGGGTTGTATATAAACAAAAAGAAGAAATAACGGACACTAGTTCCATAGCGCTTGTATTAAAA  
TGATTCAAAAGGTGACTTGAGACTTAAGGAAGAGTTTATCAAAGATAATGTTCCATACATTATAAGAAC  
GATTTCAAATGTATTGGGTATAGTGGTGGATGACAGGAACAGTGAAGAATTCAGCATTGGACTTGCGGCT  
TTTAATGAAGCTATTGACAGATACGATTGCAATAAAAACGGCAATTTTTATACCTATTCCTTTTTGGTTA  
TCAAAGTAGATTGTTTACTTTATAAGAAAAAACAGAAAGCATAGAAATGTTTTACCTTTTTTCATATAT

TGAAGAATCAACTCGAGTAGAAGAAAGACTTTTGTTCATGTGATTCAAATGGGCAATTCGAAAAAATTGAG  
GTAAGGCAGGAACTTGTAAAGTTTTGAGAAAAATTTAAAGGAATTCGGAATTTCACTGGAAGACTTGGTAT  
TGTCCTCTCCAAAACATAAGGATTCAAGGCTTTTATTAATAAAAATCGCCAGAATAATTGCTGCGGATGA  
TGAAATATTTAAAAAACTGGTCACCAAGAAATATATACCTATGAAAGAGCTGCTCAGTCGAATAAAGGTA  
AACCACAAGACAATCCAGAGAAACAGGAAATTTATAATTGCTGTCAGCCTGATTTTACGAAGCAATCTAT  
ATGATCTTAAGGAGTATGTACAGGGCTTCGAAAGGGAGGGAAAGTATGATGAATAA

>C\_sp\_Bc\_iso\_ODM25738\_SigI4\_like\_RsgI4\_CBM3  
TTGTTTGTAGCCCCAACTTATTATCTGACCTAAGAAAAAGAGAAAAAAGTCTCGTGTGATTCTATAAATC  
ATATTGTTATAAAGATCAAAAATGGAGACACGGAATTAAGGAAAAATTTATTAATAAAAATATAGACCATA  
CCTATTAAGATTATATCCAGTACTCTTGGAGATATGTTGACCCTGAGGTAAGTGAGGAGTATAGTGTG  
GGACTTATGGCATTTAATGAAGCTATAGATGGTTTTAATCCTGATATAAATGGGAACTTTACGAATTATT  
GCAATATGGTAGTAAATCATAGAATTATCGATTACATAAGAAAAACAAGAAATACAGCAATGTTATACC  
TTTTTCTATTTTGTAGGAGAGAAACGACTTCGAAGAAAAATATCTGGTCTCTGATAGTCATTACCTTTAT  
GAGAATATAGAAGTAAAAGAAGAGGTTCTGCAGTTTGAACAGCAGTTAAAGCAGTTTGGAAATACCCTTG  
AGGATCTTGTAGTGAATTCACCAAAACACAAGGATTCAAGGGAAGTTTGCATCAATATTGCCAGAGTTTT  
GGCCGAGAATGATAAGTTGTTTTGATAAACTTCTTCGCAAGAAGTGCATTCCACTATCTGAATTAATGGGG  
TTGTTAGTGTCCATCGAAAACTGTAGAGAGGAATAGAAAGTTCATAATAGCGGTGAGCTTGGTTTTAA  
GAAGCAGTCTTGATGAGATAAAGCAGTTTTTTCAAGGAGCCTGAAGAAGGGAGGGGACAATAA

>C\_sp\_Bc\_iso\_ODM24951\_SigI5\_like\_RsgI5\_CBM42  
ATGCTATTTATTTCTGCTATTGTAGATTATACTAGTGAAACAGCAACCCACATTTGTTCAAAAAATCAAAA  
ATGGCGATAAGCATTAAAAGAAAAGTTTTATAAAAGACTATATCCCATTTATATTAATATTGTATCAGG  
CTTCTATTCCTCAAAAACGATAGATTTAAAAGCAGCGATGAATATAGCGTTGGCCTAATGGCATTTAAT  
GAGGCCATTGAGAAGTTTGACATTAATAGGGGTAGAAGTTTCTCAAATTCGCAGAATTGGTGATAAAAA  
AGAGAATGATAGACTATTTTCAGAAAAACATCATCAATTGGTAGAAAAGAAATTCCTTTTTTCGTATTTTAA  
CAGTAAAAGTGAAACCGAATTTGAGAAAATAATAAATTTTGTCTGAGGCTGATCAAGCGCCAGGCAGCTAC  
GAATTTATTTGCGAATTGAAGGATTTTTCAAACAACCTAGAGAGTTTTGGTCTAAGTATAAATAATTTAC  
CTGACTACATGCCCAAGCACAAGGACTCAAGACAAATGTGTATAGATATCGCTAAAAAATAATTGAAAA  
CAAGAGTATTTATAATAAATTA AAAACAAAAAAGTACATACAAATGAAAGAGCTTTCAAATAAATTGAT  
GTACATCCAAAGACTGTTGAAAGAAACAGAGCATTATATATGTTTTATGTATAATATTTGATAATGATT  
ATGGAAACTTCAAAGCATACTTAAGCAAAATATTTTTAA

>C\_sp\_Bc\_iso\_ODM26859\_SigI6\_like\_RsgI6\_GH10  
GTGGATTGGCATTCTCAGAGTACAAACGATGACAGGGAACGTACAAAAAAGATTATTATAGAGTTCCTGA  
TGAAAATAAAAACCGGGGATGATTCTGCAAGAGATGAGTTTATCCTGAGGTTAAGCCGTTTATACTAAA  
ACAGGTATATAAGGCAACTGATAAATATATTGAACCTGAAAACAGCGAAGAGTACAGCGTTGCTCTAATG  
GCTTTCAATGAAGCTATTAATACCTATGATGAGGGGAAGCATCCTAACTTCTGGTTTTCTCAGAACAGG  
TTATTAGTAGAAGGCTTATCGACTATAAGAGGAAGAATTATAAAAATAAGATGGTATATCCCTTTTCTTA  
CTTCGAGAGCGAAGATATCAGGCTAGAAAGGACATTGTCGGATGTCGATGGCACAAGTGCAATTGAAAGA  
GTGGAATTTACAGATGAAATCAGGCTTTTCAAACCTGAGCTGGCTTCTTTCAACATATCCCTTAAGGATT  
TACTGTCTTGCCTCCCAAACACAGAGATTCGAGAGAATTATTGATAAATATCGCAAAAAAAGTTGCTGG  
CAATGAGGGGTTGTATGAGAAGCTTAAAAGACCAAAAAGCTACCTACATTGGACATTTTAAAGCTGGCA  
AAAGTCAGCAGACGAATATAGAAAGAAACAAAAAATACATAATTGCAGTAAGCTTGATATTAAGAAGCA  
ACCTCGAAATCTTCAAGGAATACGCTGGGTGCAGCAAGGAGAAGGAGGTGGATTTGCTGTGA

>C\_sp\_Bc\_iso\_ODM27255\_SigI7\_like\_RsgI7\_UNK  
ATGTACCCTGTTACTATAAACAGAGGGTTGAGTCAATTA AAAATGATGATGATGAGATAAATATTTTCG  
TTGAGGAATACAAACCTTTTATAGCTGCCTGTACACAGAAGGTGGTAGGGCGTTATGTTGCCATGGTCA  
GGACGATGAGTTGAGCATTGCGTTAATGGCCTTTGTAGAGGCTATTTCGTTCTTATGACGGCGCAAAGGGC  
AATTTTCTTTCTTTTCCCAGAATGTTATTAGAAGAAGAATTATAGACTATCAAAGAAAAGAAAAAAGT  
ACAATACGGTTATTAATATAAATGGGTACTCGGATGAAGAGGAAGAGGAGACTGACCTTAGTATTGCTAT

GTCCATGGAAGAGTACTCAAAGAGGAGGCCAGTGAATATAGAAGGCTAGAAGCTCCAACAATTGAAAAGG  
GAGCTTGAAGAGTGGGAATATCCTTTTTTTGAGCTGGTTAACATATCTCCAAGCATAAAAAGACCAAGA  
GGATTTATTCCGATATAATAAGATTTCTTTTGTCAAGACAGAATATTATTGAGAAAATAAAGCAAAAGAA  
ATATATACCTATTGCAGAGATAGAACAGAACCTGAAAATACCTCGGAAAACGATTGAAAGAGCTCGAAAA  
TATATTATAGCAGTAGTTATAATATGTACCGGAGATTACGAGTTTATTAAGGATTACGTAAACTGGGAGG  
TGTA

>C\_sp\_Bc\_iso\_ODM27746\_SigI8\_like\_RsgI8\_UNK

TTGATAAGTTTTAAAATCCTACAACCTTATTATGGCATGAAAAAGATTCTTTTATAGAAATCATAAAAAGAA  
TCAAATCTGGCGACAACCTTACTGAGAAATAAGTTTATTGATGACTTCAAACCCTTTATTTTAAAATGTGT  
ATCTCAATCCGTAGGTAAAAAAAATAATTTAATTCAAAGCGATGAGTACAGTATTGCTCTCATTGCCTTC  
AACGAAGCTATCGAGTCTATGATTTGGATAAAAAGACAAGGTTTCGTTAGTTTTTCGAAACAGGTAATAA  
AAAGACGGCTTATAGATTATTTGAGGAGCACAAAAAGAACAATGTCACGTACCTTTTTTCATATTTTAA  
TGATAATAATACTGGTTTTGATGATCACAGCACTTGTAGCTTCGAAGAAAAGTATTTATGTGATAAAAAT  
TCAGACTATAGCATTGATTTTGAACCTAGAGAGGAAATCAAGAATCTGGAGTTAAAAATATGTGAATACA  
AAATGTCCATTGAGGATTTGATTGAATGTTCCCCAAAACATCGTGATACTATAATTTTCATGCCTTAATAT  
AGCAAATATTATTATAGAAAATGAATCACTATAACCGAATATTCAGAGAAAGGAAAATTTCTCCCATACAAA  
GAATTATCCGATCATTTTAATCTATGTGCAAGAACTCTCGAAAAAACAGAAAATTTATTATCGCTATGG  
TTTTTATACTTAAAAGTGATCTTGAGATATTA AAAAAGTACATATATGATACAATAGGACGGTGA

>C\_sp\_Bc\_iso\_ODM25355\_SigI9\_RsgI9\_CBM3

TTGGGAAAGCTGAGTTTTTTGAAAAGCTAAAATCCGATAATGACCCTACGAATGATATTGTGCTGAAGA  
TACAAAGCGGAGACAGGTTATTA AAAAGAAAATTCATACACGATTACACTCCTTTTCATTTTAAAACAGT  
TGCCCAAATAACCGGAAAATACGTGATACTGAAAACAGCGAAGAATATAGTGTTGCACTTATGGCTTTT  
GATGAAGCCATAGACTGTTTTGACATAAATAAAAACAAGAGCTTTTTTAGGTTTCAGCGATCTTGTTATAA  
ATAGAAGGGTCATAGATTATCTGAGGAAAATCAAAAAGGAGAGGAATGTATTTCCTTTTACCTACTTTGA  
AAGTGAAGCAAACAATGACTTTTAGAGAAAAGTATATGCCTCAATATTCCACTGTGAGGCTTGATAATATT  
GAAATCAAGGAGGAAATTATTCTATTTAAGGAAAGATTGTCTCTTTTGGTATAACTCTTGAAAACCTAG  
CCAAGAGCATGCCAAAACATAAGGACTCAAAAATAATGTGTATCAAAAATAGCAAAAATAATTGCAAATGA  
TGACAAGCTTTTTCAATAAACTAAATAGAACAAAGCACCTACCTATGAGTGAATTAATGAAGCTCGTTGAT  
GTACATCAAACAACGATAGAAAGAAACAGAAAATTCATAATTGCCGCTAGTATAATTATAAACAGTGGTT  
TTGATGTAATAAAGAGTTATCTTTTGTTCATGGAGGAAGGCGGTGAAAGACATGATTAA

>C\_clariflavum\_Clocl\_1054\_AEV67731\_SigI1\_RsgI1\_CBM3

TTGACAGATATATTTTTCCCAAAGAAGAGAAAAAAAGGTAGTCTTAAGGATGATGATTATACAGACGATG  
TTGTCCTTACAATTAATAAAAATAAAAAGCAGGAGATAATTTATTAAGAAACGATTTTATTGAAAAATACAA  
GCCTTTTATCCTTAAAACCTATCTCCAGCGTAACAGGTAATTATATTGACACTGAGAACAGTGATGAGTAT  
AGTATCGGTCTTGCTGCTTTCAATGAGGCTATAGATTGCTTTGATGAAAGTAAAGGAGTTATGTTTTTTA  
AATTCAGCTCATTGGTAATTA AACCGCAGAGTGGCTGATTATATTCGTCACAACAAGAAGCACATAAAGT  
TCTCCCTTTACATATTTTTGAAGATGCCAACGACAATAACTTTGAGCAAACCTCATTTAAAAGCCTTAAAT  
GATGATTTGACAACTTTTGAATTCAGCGAAGAGGCCAAAAACTTTGAAAAGAACTTAATGAACCTTGAA  
TTAGACTTGAGGATCTTGTTTCGTTCTGCACCTAAGCATAAAGATTCAAAGCTCTATGCCTTAAAATTGC  
AAAAGCTATTGCTGACAACAAAGAAAGTTTCAGCAAGCTTGAAAAAACTGGGATAATTCAAAATCAAAA  
CTGGTCAGAGCGTTGAACATAAATAAAAAAACTATAGAACGAAATCGAATATTTATTATAGCTGCTGCAC  
TCATTATAGGCAATGGTTTTTTATCTACTGAGAGATTTCTTGATATCCCGGAAGTTGGAGGGAAACACAT  
TGAACAAAGTAAAAAATGA

>C\_clariflavum\_Clocl\_2045\_AEV68643\_SigI2\_RsgI2\_UNK

GTGGACATGTGGTTTTTTGGCATGCGAACGCCGAAAAGAGATCTTTTATAGATATATTGCAGCGTATAA  
AGGCTGGCGATAAATTATTAAGGACAGGTTTATTAGTGATTACAAACCTTTCATTATTAATCTGTTTC  
CCAAATACTCAACAATAGATATATAGATATAGAAAACAGTGAGGAATACAGTGTTGGGTTGATTGCTTTT  
AATGAAGCTATTGAAAATACGATAAGGACAAAAAATGTAGTTTTTAAGAAGTTTTTCATACCAGGTTATGC

AGCGAAGGTTAATAGATTACCGAAGAAAGAATGAAAAGAGCTCAAAAGTCTATCCGTTTTTCATATTTTGA  
GGAGGATGAAAACACTGCGATTTTTGAGTACAAATATTTGGTAGAGAGAGATACAGACCATGTTTATAATTTTC  
GAAATCCGAGAAGAGTTTGTTCGTTTGTGAACAAAATGAAGGATTTTGGAAATAACCATGGATGATTTGG  
TGAAAAACATGCCCAAACACAGAGATTCCAGGAAGACTTGTGCGAAAATTGCAAAATATATAGCTGAGGA  
TGACGATTTATTTAATAAGTTTAATGCAAAGAAAACACTATTCGTTTTAAAGATATAGCTGATTATATAGAT  
GTAAGTCAACGAACAGTCAACGCAACAGAAAATACATCATTGCTTTGGTGCTAATTCTGAAGAGCGATC  
TTGATATTATAAAGAACTACATTA AAAATTTGGAGTAA

>C\_clariflavum\_Clocl\_2099\_AEV68696\_SigI3\_RsgI3\_CBM42  
ATGCTATTTATTTTCAGCTATTATAAATTATGCCGATGAAACAGCTGCACATATTTATTGAAAAAATAAAAA  
AAGGGGACAAGCAGTTAAAAGAAAAATTCATTGAAGACTATATTCCTTTTATATTAAAGGTTGTTTCAAG  
CTTTTATTCATCAAAGATAGTTGATATGAAAAACAGTGATGAATATAGCATTGGCTTAATGGCATTGAT  
GAGGCAATAGAAAAGTATGACAGTACTAAAGGAAAAAGTTTTATTAAATTTGCTGAAATGGTTATAAAGA  
GAAGAATGGTGGATTATTTTCAGAAAAATATCGGCTGTTTGCCAAAAAGAAATACCGTTTTTCATATTTTGA  
AAACGAAAATGAATTTGAGAATCATATAAATCCCTTCGGTGCCGAAATGAATTGGACAGATATGAACTC  
ATTTGCGAACTGAAGGACTTTTCAAACAATTGAAAGATTTTGGACTGAATATTGAAAATTTACCCGATT  
ATATGCCGAAACATAAAGACTCAAAGCAAATTTGCATAGGCATAGCTAAAAAGATAGTTGAAAACAAGGT  
AATATACGACAAGTTGAAAAACAAAAAGTATTTTTACATGAAAGAGCTTTCGAAAATAATTGATGTGCAT  
CCGAAGACCGTTGAAAGAAACAGAGAAATTATAATTTGCTTGTGCCTGATATACGGAAATGACTATAGAA  
ATTTTAAAAAGTATTTAAATAAAAATATGTTAG

>C\_clariflavum\_Clocl\_2748\_AEV69302\_SigI4\_RsgI4\_2xPA14  
TTGTTATTTCTTTTTTCAATATATAACTCCGAAGTTAAGGAGGATTTAGCCAGCATTATCGATAGAATCA  
AAGCGGGAGACGATCAACTCAGAGAAGAATTCATTGTAGATTACATTCCTTTTATAATCAAAGTACTTTC  
CAATTCGGTAAAAAATAAGATTGATATAAAGAACAGTGATGAATACAGTATTGGTTTTAATAGCTTTTTAAT  
GAAGCAATTGAGAAATATGATAACAGCAAGAATAAAAAAGGGTTTAACTTTTTTTCCTTTGCAGAGATGG  
TAATAAAAAGAAGAATAATTGACTATTTTCAGGATTAGCTCGAAAAATAAGGAAATGCCTTTCTCATATTT  
TGAATGGGATGATGAGCATTTTGAGGACAAATTCCTTCAGGATGAATCGTCCGGCAGGATATGAGAGAATT  
GAAGTGTTCAGGAAATAAAGCATTATTCGGAGATGCTTAAAAGTTTTGGCATAAAAAATAAGTGAGCTAC  
ATAAATATACGCCCAAACACAGTGATTCTATCAGGATGTGCGTGGAGATAGGTCGTA AAATTTGCAGAGAA  
TAAAGAGGTTTTCAATAAGCTTGTA AAAAAGAAGTATTTTCCCTATGAAAGATATAATGAAATTTGTAAC  
GTACATCCCAGCACGATAGAAAAAACAGGAAATTTATTATATCGGTAAGCCTTATTTATGGCAATAACT  
ATGAGCATCTTAAATCATACTTTAATAGTGGCAGGTGA

>C\_clariflavum\_Clocl\_2798\_AEV69351\_SigI5\_RsgI5\_UNK  
TTGATAAATCTTAAATTGCGCAGCATGAGAAAGCAGGAAGCAGATTCCCTTCTTGGACATAATACAGAAAA  
TAAAAGATGGCGATGTTCTCCTGAGAAATAAATTTATAAATGATTACAAACCGTTTTATATTAAAATGTGT  
ATATAAATTTGGTAGGAAAAAAGAGAATTTGGTGCAAAGCGATGAGTACAGCATAGCTCTCATGGCTTTT  
AATGAAGCATTGGATTTCATATGATGCGGATAAAAAATATAAAATTTATCAGTTTTGCGAAGGAGATAATA  
GAAGACGAATTATAGATTATATAAGAAGTACAAAAAGAACAATATGGTGATACCCTTTTCGTATTTTAC  
CGAAAATGACAACAATTTTGAGGAAGAGTATTTGTGTGATACCAGTTCAGACTATTGCAGCTATTATGAT  
GCCAAGGAAGAAATAAAAAATCTTGAACAAAAAATGAATGAGTATAATATGACAATTGAAGAATTGATTA  
ATTCTTCCCAAACACCAGGATACCAGATTAATTTGTCTTAATGTTGCGAAGATTATTACAGAGGACGA  
GATGTTGTTCAAAAAATTTAGGGAAAAAAGACATTGCCATATAATGAACTAAGAGAACATGTTAATTTG  
TGCAGGAGGACTTTGGAGAAAAATAGAAAATTCATTATTGCCATGGTTTTAATACTTAAAAGTGACCTTG  
ATGTA CTTAAAAAATACATATTTGATACTATAGGACGGTGA

>C\_clariflavum\_Clocl\_2844\_AEV69393\_SigI6\_RsgI6\_CBM3  
TTGAATGTCCGGAATATCTTTAGACCTGAGGGGAAAAACAGTAACGATCGGACTGATGATACATTTTATA  
ACACCTTGAAAAAATAAAAATGTGGGGACGAGGTCTTAAGAAACGAATTTATTTCAAGCTATATACCGTT  
TATATTGAAAGTAACTTCCAAAACAGTGGGGAAGTTTATTGACGTAAAAAATAGTGATGAATATAGCATT  
GCTTTGTCTGCTTTCAATGAGTCCATTGACAGCTATGATTTTTGCAAAAACACTATAACTTCTTTTTGTTTT

CCGAACAGGTTATAAAGCGGAGACTCATTGACTATTCAAGAAAAAGCAGCAGACAAAAGGAATATCCTTT  
TTCATATTTTGAGGAAGAATACGATTTTAATGAAGAGCCCTATGTGAACATCATATTTTAACATAGAG  
GATATTGAATCCAGGGAGGCAATTATTGATTTTAGCAATAAGCTTAAAGAGTTTAAATATCAGCCTGATGG  
ATCTTACAAGGAGTATTCCTAAGCATAAAGATTCAGAAAGGATGTGTATAAAGATAGCGAGAGTTCTGGC  
AGAAAATGATGAATTATATGAAAACTAGAGAGAAACAAAAACATTCCCAGAAATGAGCTTAAGAAACAG  
ATTAAGTACATAATAAGACAATAGGAAACAATAGAAAATATATTATTGCAATGTGTTTGATAATAAGGG  
GAGGGCTGCAATCTCGCAGAAATACTTGCAGTATACCGAAGAAGGGGTAGACGGCATGATGAAATTGG  
GGATAGTCTATGA

>C\_clariflavum\_Clocl\_4009\_AEV70445\_SigI7\_RsgI7\_CBM3

TTGAAGGTAAATCTCTCAAAATTTGGCATGAACAGATTAAGCGATAAGCCTTCTAATGATGAATTCATTT  
CTACGCTTAGACTTATAAAGAAGGCGATAACCTTTTAAGAGAAGAGTTTTTAGCGAAGTATACTCCTTT  
CATATTGAAAATTGCATCGAATTTTACCGGAAAGTATATTGATGTAAACAATAGCGATGAATACAGTATT  
GTATTATCTGCTTTCAATGAAGCAATAGATTGCTATGACTTGACAAAAAATAACTTTTCTGCTGTTTA  
GTGAACATGTTATAAAAAACGTTTGTATCGACCATATGAGAAAGGACAAAGGAAACAAAGAGATTCCCTT  
TTCATATTTTGAAGATGAAACTGAGTTCCTTGAAAAGTATGTAAGTTCTGTTTCATGATAAGAGCTTTGAA  
GATATTGAGCAGATAGATGAAATCATTGAATATAAGGAAACATTAAGAGAGTTTGGAAATAAGTTTGGAGG  
ATTTGATTTTAAACGTACCCAAACACAAAGATTCAAGGGAATTATGCCTTAAAATAGCTTCAATTCTTGC  
CAATGATGAGGAATTGTTTCAGACAATTGTATAAATACAAAAATATTCCAAGAAATGACCTTAAGAGAAGA  
GCCGGTGTTCATGGAAGAACTATAGGAAGGCATAGAAAGTATATAATCGCAGTGTGTCTGATTTTAAAGA  
GCAACCTTGAATTTCAAAGAGTTATTTAAGTATTGCCGAGAAGGGAGGGAAAAGGGGTGAATAA

>B\_cellulosolvens\_Bccel\_0204\_KNY24947\_SigI1\_RsgI1\_2xPA14

TTGATTTTTACTTTTACTGTCTATAATTCTGACAAAGAGCATGCCGGACACTTGATTGACAGAATTAAG  
AAGGAGATGAAGAGCTTAGGGATAAGTTTATAAACGATTACATACCTTTTATTTTAAAGGTTATTTCCAA  
TGCAGTACCAAACAAGGAAGGTCTTAGGAATTGTGATGAATACAGTATTGGGCTTATTGCTTTTTAATGAA  
GCTATCGATAAAATTTGACAGCGACAAAAGTTTCAAACATTCAACTTTTTTTAGTTTTTGCTGAACAGATTA  
TAAAGCGTAGGATAATTGATTATATAAGAATTGTATCAAAAAGGAGTAAGGAAATACCTTTTTTCGTATCT  
GGAAGAAAAGAACTCAATTTGATGAAAAATATATCAATGAGCCTGCAATATCAAAGTATGACAGGATA  
GAGCTTTTTTCAAGAGATTAAGGTTTTGATGAAGAATTAAGGCAATTTGGAATAAAGTTAAGTGATCTGC  
ATAAGTATACACCTAAGCACAGTGACTCAAGAGAGATGTGTGTTAAAGTTCGGCAAAAAGATTGCACAGAA  
TAAGGAAATATTTAAGAAAATAATAAATAAAAAATATTTTCCAATGAAAGAACTGACCAAGATTGTTGAT  
GTACATCCAAGGACTATTGAAAGAAATCGAGAATTTATTTATATCTGTTTCAATAATATATGGAAATGACT  
TTGAGCATCTACAGTCCCTATCTTGGCCGTACGTTAGGGGGAAGGGGTAAAAATGGGTAA

>B\_cellulosolvens\_Bccel\_0630\_KNY25370\_SigI2\_RsgI2\_FN3

TTGCTTAACCTGAAGTTCTTCAAAAAACAAAGGCAGGAAAACGACCCTTTAAGAGATATAATAGTAAAA  
TCCGCAATGGGGACCAAACACTAAAAGATAAAATTAATAAGTGATTACCGTCCATTTTACTTTCAATCCAT  
ATCAAAGGTTACAGGCAAATACATTGATCCTGTTAACAGTGAAGAGTTTAGTATAGGCTTAATGGCCTTC  
GATGAGGCAATAAACTGTTATGATGAAAGTCAGAACAGAAATTTTCTCAACTTTTCAGACCAGGTAATTA  
GACGCAGAGTGATCGATTTTTTAAGAAAGAGCAGTAAATCACAGGTAGAGTATCCCTTTACTTACTTTGA  
GAATGAGGAAAATAATAACTTTGAGGAAAATACCTTAAGGTTGAATATGGCACGTCCACAGATAATGTA  
GAGATGGAAGAGGAAATTATCTCATTCAAAGAGATTTGATGAGATTTAATATAACTTTGTCATCCCTCG  
CATCTTGTGCTCCAAAACATAAGGATTCAAAGCAGCTCTGTATAAAGCTTGCAAGAATAGTTGCGGACAA  
TCAGGCGTTGTATGACAGGTTTCATGCGAACAGGTAATATACCAATAACCGAGTTGACAAAAATTACAAAT  
GTTTACCATGGAAGTGTGAAACGCAACAGAAAATTTATAATAGCAATGATACTTATACTTAAGAGTAACC  
TTAATATTTCTTCAAGGTTACATACGTGATGTAGAAGGAGGTGGAAGATATGAATAA

>B\_cellulosolvens\_Bccel\_0725\_KNY25465\_SigI3\_RsgI3\_CBM3

TTGGCAAAATTGAGTATTTTTAAGAAGCTAAAACCTGAAATCGATTACACTAATGACATAATAATTA  
TTCAAGATGGAGACAAGCTTTTTAAAGAAAGATTTATAAGTGATTATACTCCTTTTTATTTTAAAGACAGT  
TGCCAGAATAACCAATAAATATGTTGATGTTCAAACAGCGAAGAATATAGTATTGCACTGATGGCATT

GATGAAGCAATAAATTGCTTTAATATAGACAAAAACAAGAGCTTTTTGGCATTTCAGCGACCTTGTTATCA  
ACAGAAGACTTATAGACTACATTAGGAAGAACAGAAAAGATAATAATGTATTTCCCTTTTACATACTTTGA  
TTGTGAATCATATGAGGAACTTAAAGAAAAGTATTTGCTTGAATACTCTGTTACAAGGCTTGATAACATT  
GAAATAAAGGAAGAAATTATTCTCTTTAAGGAAAACTGGCAACATTCGGTATAACCCTTGAAAACCTGG  
CTAAAAGCATAACCAAAACACAAAGACTCGAAACTAATGTGCATTAGAATAGCAAGGATTATAGCCAGCGA  
CAAGGAACTTAATTATAAATTAATAAAAACAAAGAATATTTCCAATGACTGACTTGATGAAATTAGTTGAT  
GTACACCATGCAACGATAGAAAGAAACCGCAAGTTTATAATTGCAGTAAGTCTTGTAATAAATAGTGCC  
TTGATGTTATAAAGAGTTATCTTCAGTTTACTGAGGAGGGGGGTGTGAGTGGTGATTAA

>B\_cellulosolvens\_Bccel\_2224\_KNY26959\_SigI4\_RsgI4\_FN3  
TTGCTTAATTTTTTCCATTACAAAAGGAAAAATCAAAAGACATAAGTATAAACGATATTATCATTAGAA  
TCAAAAAGGGCGATAAAGAGTTAAAAGAGTGCTTCCCTTAATGACTATAAACCTTTTATAGCCAAGGTAGT  
CTCTCAAATCACGGGTAAATATATTTATCCTGAAGAAAGTGAAGAATTCTCTATAGCTTTGATAGCTTTT  
AATGAGGCTATTGACAATTTTAAATGAAAATACCAATGGTAATTTTTTTGAGTTTTTCCAAACAAAATATTA  
AATGGAAGCTGATAAACTATTACAAAAGCACTCTAAAGACAAGAACGTGTATCCATTTACATATTTTGA  
CAATGATAACAACAATGATTTTGAAGAGCGATACCTGACAATTGAATCAAACCAGGTTTATGAGTCTATC  
GAAAGAAAAGAACAGATTGTTTCACTTTACGAAAAAGCTTAATGATTTTGAATTACCTTTGAAGATTTGC  
TGGTTTCAGGGCCAAAGCACAAAGATTCCAAGGAACTATTGATGGGTATAGCAAATGAGATTTTTTCCAG  
GAAAGAAATCTATAATAAACTTTTAAAGTCAGAAGAGCATACTGTAAACGATCTTTTAAAGGTTACCTCC  
GTCAGCAGGAGAACTATAGAAAGAAACAGGAAGTTTATTATAGCTGCATGCTTAATTTTTTAATGAAGATT  
TCGACTTTTTAAGAAACAGAAAAAATACTTCCAGTATACACAAAAGTTGCCATATTCAAGATTAA

>B\_cellulosolvens\_Bccel\_2755\_KNY27484\_SigI5\_RsgI5\_UNK  
ATGAATGATAACTCGCTTAATGAAAGGGTTCAGAGAATAAAAATCCTCTGATATTGAAATTGATAAGCTTG  
TTGAGGAGTATAAGCCATTTATTGCATCATGTGTTGAAAAAATTACAGGTCGTTTTGTAAGATACGGTGA  
AGATGATGAGCTTAGCATTGCACTTTTAGCCTTCGTTGAGGCCATTAAAGCGTTTGATATTTCAAAGGC  
AATTTTCTCTCATTGTCACAAAATGTTATTAACGAAGACTAATTGATTACTTTAGAAAAGAGAGCAAGC  
ACAGTAAAATAGTTTCAATTAGTACTTATACCAGTGACGATGAAGACAACGAGCTGGATTTAAGTACTGG  
TGAGGCTCTGGACAAGTATTTCCAGGATAACATCAGTGAATACAGGCGTTTTGGAGCTCCAGGAACTAAAA  
AAAGAGCTTGCTTTATGGGATATCTCATTTTTTGAGTTAACCAACGCCTCTCCCAAATCTGAGAAAACC  
GTAAATCATATAATGATATTATTCAATATCTTATGAAGAACCCCGACACGCTTGATCAGGTTAAAAAGAA  
AAAGCTTCTTCCAATAGCTGACATAGAAAAAATAACAGGAATACCCCGAAAAACCATTGAGCGATCACGA  
AAATATATATTAGCTGTTATAATAATTTTAAACCGGAGATTATCAATATGTTAAGGATTATATAAACCCGG  
AGGTGATGAAATGA

>B\_cellulosolvens\_Bccel\_3092\_KNY27821\_SigI6\_RsgI6\_CBM42  
ATGCTATTTATATCAGCTGTTTTAAATTATACTGGTGAAACAGCTACCAGTATTGTTCAAAAAATTAAAA  
ATGGAGACAAGCGTTTTAAAAGAGAAATTCATAGAAGATTATATACCGTTTTATTGTAAGAGATTTCAA  
CTTTAATGCTTCAAGTATAGTTGATATAAAAAATAGTGATGAATATAGCATTGGTCTTATGGCGTTTTGAT  
GAGGCAATTGAAAAATTTGATGGCAGTAAAAGCAGGCAATTCCTCAAATTTGCACAGATGGTAATTTAAA  
GAAGAATGATAGATTATTTAAGACATATATCATCTATTAGCAAAAATGAAATTCCTTTTTTACATACTTTAA  
CAGCAAAAGCGATAGTGAGCTTGAGGAAAAATTAATATGTTTGATTTAGGAGTGGAGGCAGGCAGGTAT  
GAACTTATATATGAGTTAAGAGACTTTTCAAGACAATTGGAAGCCTTCGGCTTAAATATAAGAGATCTGC  
CTTATTATATCCCAAAACATAGGGATTCAAAACAAATGTGTATAAGTATTGCTAAAAAAGTTATTGAGAA  
TAAGAATATTTACGAAAAATTTAAAACGAAAAATACTTTAAAATGAAAGAACTTACTAAAAATAATAGAT  
TTTCATCCAAAGTCAGTGAAAGAAACAGGGAGTTTATTATATGCTTATGTATATTATATGGAACGATT  
ACGAAAAATTTCAAAGCATATTTTAAACCAGGTATTTAGATAA

>B\_cellulosolvens\_Bccel\_3399\_KNY28128\_SigI7\_RsgI7\_UNK  
GTGTTTTGGTATAAAAAGGAACAAGAAAATTCAAACTGGTTCATTAGAAGAAACGATAAAAAGAGATAAAGC  
TTGGCAATAGCCAGCTAAAGGAATTACTTATTGAGAATTACAAACCGTTTTATTCTAAAATGTGTTTTCAA  
AACCTCAAAAAGTTTTATTGATACATATAATTCCGAAGAATATAGCATAGGACTTATAGCCTTCAATGAA

GCAATTGAATGCTATGAAGCAAATAAAAATGCCCATTTTTTTGACTTTTGCAGAAATGGTTATTGACAGGC  
GTGTAAAGAATTACCTTAAGAAAGAGCAAAGCATAAGAATGTTATACCCATTACAAATTACTTATCAA  
TGAGGACCAAGGAATGAACATTATTGAGAACGATTCCATGATAATACATTTTTCATCAGGTCGAGACCAGG  
TCAGAAATTGAGCAATTTAAAAAGGATTTGGGAAAGTTTGATATAAGGTTTGAAGATTTAATAAATGTAA  
GTCCTAAACATAAAGATGCACGGATCAGTTGTATAAAGATTGCAAAGTTTATTACATCTGATATAAGTCT  
TTTTAGCAGGCTGGTAGAAAAAAGAATCTTCCGGTTAAGGATATACTAAGCAATATAGATGTCAGCGAG  
AGAACGCTTGAAAGGAACAGGAAGTACATAATTGCTGCATGCTTGGTAATAAAAAGTGATTTGGAAATTG  
TAAAGGGATTTTTGCTTGATCTTGAAGGGGGAGTATGA

>B\_cellulosolvens\_Bccel\_5133\_KNY29856\_SigI8\_RsgI8\_CBM44

TTGTTTCGGGTTGGACTTACTAAAAACAGAGATAAATTTTCTATCGATTTCGATAATTGAAATAATAGGCA  
GCATTAGAAAAGGGGACTTGCAGCTTAGAGACAGGTTTATAAGTGAAAGCATGCCTTTTATTATGAAATC  
ACTATATAAAATTTTAAAAAGACATATTGATATTA AAAACGATGAAGAATTCAGTATAGGCTTGTCTGCT  
TTTAAATGAAGCAATAGATCATTATGACCTGTGTAGAAAAGGTA ACTTTTACAGGTACTCATATATTATGA  
TCAATCATAGGATTATTGATTATTTAAGAAGTACAAAAAGAAACGATAAAACTATAACCATTTTCAAGTAT  
TGAAGATAAAGAATCCTTTGAACAAAGATACCTTACTTCAAATACACAAAATCAATACGAAATAGTGAA  
CTAAAAGAAGATATTCTGATTTTACAGCAGAATTTAATGGCGTTTGGCATAACTTGGGATGATTTGATAG  
GCAATTCGCCTACACACAGGGATACGAGATGTCTATGTATAAGAATAGCAAAGAGATATTGGAAAACGA  
GGATTTATATACAAAATTCATAAATACCAAGAGAATTCCTCGATCTCAATTGGTGGAACGGTTGAAGATT  
CACCGGAGAACAATAGAAAATCACAGGATCTTTATTATAGCAATTTGCCTGGTTTTAAGAAGTAATCAGG  
ATGAATTGAAAGCATTTCCTTCACTTTGAAGAAAGGGGGGAATCATTATGA

>B\_cellulosolvens\_Bccel\_5156\_KNY29879\_SigI9\_RsgI9\_UNK

GTGGCAGAAATTATGCTTTTGTAGTAAATTCAAACGAGAGAAAGATTCTTTTATTGATATAGTTAGAAAAG  
TTAAAAAAGGTGATGATTTACTGAGAAATGAGTTCATAAATAGCTATAAGCCCTTTTATTATCAAGTCTGT  
ATCTCAAATAATAAATAAAAATATAGATATTGAATCAAGTGAAGAGTTTAGCATTGGTCTTATGGCATT  
AACGAATCCATCGAATGTTATAACGAAGAAAAAATATTCATTTATGGATTTTTCAAAACAAGTCATTA  
GAAGGCGAGTTATCGACTATATACGACTTTCACAAAAGAATGCCAATGTTTACCCTTTTTCTTCTTTTGA  
TGATACTACTA ACTTTTGAAGAAAAATTTCTTATGGATATCCGTTCCAATCATGTTTATGAATTCGAGTTA  
AAGGAAGAGTTTGTATTATTGGAAAAATCTATTAATAGCTTCGGAATAACAATTGAGCAATTAATAAATT  
CCTCTCCAAAACATAAAGACACTAGAGCTAATTGTATAAAAATTTCAAGGCTAATTGCAGAAAATGAAGA  
TTTATATCAAAAATTTTGTTTTAAAAAACATTACCATTTACCGATTTGAAACAAAAGTCAATTTATCA  
CAAAGAACACTTGAAAAAACAGAAAATTTATTATAGCAATGGTTTTGATATTA AAAAGTAATCTTGACG  
TTCTGAAAAAATATATTGAAGATTTGCTTAAGTAG

>B\_cellulosolvens\_Bccel\_5614\_KNY30334\_SigI10\_RsgI10\_UNK

TTGGTGCTTTGGAGTAAAAAAGAAAAAAGGATGCTTCAAAAAGAATGAAGATATTTCCAGATAAATTG  
AAAGGATAAAGAGTGGTGACAATAA ACTCAGGGAAAGATTTATAGAGGATTACCGACCTTTTATTATAGG  
TTGTGTTTCAAAAACAATGAACAAATTTATTGATATAGAGAATAGTGAAGAGTTTAGTATAGGGCTAATG  
GCTTTTTCATGAGCCATTAGCAGCTATAAATATAATGAAGGGGCAGCACTTTTTAAGTTTTGCAGAGCTTG  
TAATCAGTAGAAGACTTATAAACCATAGAAAAAAGAGGTTAAGAATTCAAAGTAATACCATTTTCTTA  
TTTCGGGGGAGAAAGCGAACTGGTTATTGAGAACTCCATTTCTCAAAAATCCGTATACCTCCATTATGAT  
AGATATGAAATGCGTGAAGAGATATTGATCTACAATCAGAAGCTTGAATTGTTTGGTATAACAATGGATG  
ACCTTGTAAGAAGTCTCCAAAACATAAAGATTCCAAAGA ACTTATGATTGGCATAGCCAAAATTTATTGC  
AGATAATGAATTTTATATAACAAGCTTATTAGCAAAAAACAGTGCCAATGTCGGATCTTATTGCGTAC  
ATAACTGTAAATCCTAAA ACTGTTGAGAAAAACAGGAAATATATTATAGCAGTTTGTCTGGCATTAAAAA  
GTGAGCTTGAATTTATTAAAGGATTCATTA AAAAGTTTTAG

>B\_cellulosolvens\_Bccel\_5622\_KNY30342\_SigI11\_RsgI11\_PA14\_CBM35

TTGTTTAAAGTTTCGGTTTTTAAACCCTGGTAAAGATAAAAACAGTGTTGAATACATAGTAGAAAAGATTAAAT  
CAGGGGACACAGATCTAAAGGAAGAATTCATCAAGGATAACATATTATATATAACAAGCTTGTTCCAA  
CATTGTGGGAGCATATGTCGACAACAAAACAGCGAAGAATTCAGCATAGGATTATTAGCATTCAATGAA

GCTATAGACAATTATGATTATAAGAGGAATGGAGATTTTTACAAATACTCTTATATGGTTATAAAACACA  
GGATTATTGACAATATCAGGAAGAACAAGAGGCACCAGAATAATCTGCTGTTCTCATCAATAGAAGATGA  
TTATGATTTTAGCAATAGGTATATGGTATCAAACCTCTCATTATCAGTTTGAAAATATTGAACTGGCTGAG  
GAAATTGACCTTTTTGAGAAATGCCTTTCGGACTATGAGATTTTCATTGGGGGATTTGGTATCAAGCTCAC  
CGAAACACAAGGACTCAAGGATGTTATCCATCAAAATAGCAAGGACCCTGGCTGAAGATGAAGAATTGTA  
CCAAAAAATGATTAGGAAAAAGTGTATTCCATTATCAGATCTGCTTAAAAAATTCAGGCAAGTAAAAAA  
ACAGTTGTTAGAAATAGAAAATTCATTATTGCTGTGAGTTTGATTCTAAGGAGTAGGCTTGATGACCTTA  
AGGAGTTTGTGTGAATATGGAAAAGAGGGAAAAGTATGAATGA

>B\_cellulosolvens\_Bccel\_5637\_KNY30357\_SigI12\_RsgI12\_CBM3  
TTGGCTATCTCAAGTATATTCAATCTAAATAGAAAATTTGAGAAAACCTGGGGATTCTCAAGATAACTCCT  
TGCTCGAAATACTTGTAAAGATTAAGAGAGGGGATGGTAATTTAAGAGAAAGATTTATACTTGCTCACAA  
ACCTTTCATCTTCAAAGTTGTATCAAAGTTATGGGAAAATTTATAACCGAAGACAACCATGATGAGTTT  
AGTATTGGTATGGAAGCTTTTAAATGAATCTATAACAAGTTTGATCTTAATAAAGGATCTAATTTTTTCA  
TGTTTTCTGAACAAGTAATAAAAAGTCGTATAATTGATTTTTTTCGAAAAAATAAAAAAGCAGTACAGT  
TTACCCTTCTCCAGTATTGATGAATATGATGCATTTGAAGAAAAATATCTAACTTCCGACTCCCATTAC  
AATTATGAAAATATTGAGGTAAGCGAAGAGATCGATGCCCTAAGGCATGAACTGGCAAATATGGCATAA  
CCATCGCGGATCTTGCTGTTAGTTCTCAAAGCATGACGATTCCCGCAGGCTTTGTATAAGAATAGCAAG  
AATCCTTGCCAACGACAACCAGCTCTTTGAAAAGCTGAAGAAAAACAAAAACATACCTAGAAACGAGCTC  
CTAAAAAAGGTAAATGTACACAGAAGAACGATTGAGAACAATAGAAAGTACATAATTGCTGTTTCAATAA  
TTTTAAAAAGTAATCTTGAGATATCCAAAAGGATTTTTCAAGTATGCGGAGGAGGGGATAAGCTAA

>A\_cellulolyticus\_WP\_010251306\_SigI1\_RsgI1\_CBM3  
TTGACAGATATATTTTTCCCTAAGAGGAAAAAAGTGTTCCTCAAGGATAATGAACATACTGAAGATATTA  
TCCTTATTATTAATAGAATAAAGGCCGGAGATAATTTATTAAGAAACGACTTTATCGACAAGTATAAGCC  
CTTTATCTTAAAACTATTTCTAGCGTAACAGGTAAGTACATTGACACTGAGAACAGTGACGAGTACAGT  
ATTGGTCTATCCGCTTTCACGAAGCTATCGACTGCTTTGATGAGAGTAAAGGAGTGATGTTTTTTAAGT  
TTTGCTCTTTAGTAATAAACAGAAGAGTTTCAGACTATATGCGTCATAATAAAAAGCATAATAAGGTTTA  
TCCTTTTACATATTTTGAAGAGCCTGATAACAATAATTTTGAGCAAACCATTAAAAACAGAGAATGAC  
GGTTAGGGACTTTTGAATTTTGTGACGAAACAAAGAGTTTGAAGAAGCTTAATGAGCTTGAATTA  
AATTCGAAGATCTAATAAGGCTGGCACCTAAACATAAAGATTCGAAGGCACTCTGTATAAAAATTGCAA  
AGCAATTGCTAACGATAGAGACAGCTTCAGTAACTAGAAAAATCAGGAGTAATCCAAAAAAGTAACTG  
GTTAAGACACTGCAAATAAATAAAAAGACAATAGAAAGAACAGAGTTTTTTATTATTGCTGCTGCACTTA  
TTATTGGTAATGGTTTCTATCTATTGAGAGACTTTTTTGACATCCAGATGTTGGAGGGAAACATATTGA  
ACAAACTACAAAATGA

>A\_cellulolyticus\_WP\_040428536\_SigI2\_RsgI2\_CBM3  
ATGCCTGCTAAGAAAAACATTAAAGATCGGACTGATGATACATTTATACTAACCTTACAAAATATAAAAG  
GTGGCAACAGAGTTTTAAGAAACGAATTTATTTCAAGTTATATACCGTTTATATTGAAAGTAACCTCAA  
AACAATGGGGAAGTTTATTGATGTACAGAACAGTGATGAATATAGTATTGCAATGTCAGCATTTAATGAG  
TCGATTGACAGTTACAATTTTAGCAAAAACATAATTTCTTTTTGTTTTCTGAGCAGGTTATAAAACGTC  
GACTTATTGACTTTTCAAGAAAGAACAGTAGGCAAAGGGAATCCCCTTTTCATACTTTGAAGAAAACATA  
TGATTTTAAATGAAGAGCCATATTTAAATTCCTCAAATTTTAGTATGGAGGATATAGAGTCCAGAGAATCA  
ATTACAGACTTCGTTAATAAACTAAGAGAGTTTGATATAACGCTTATGGATTTGACACAAAATATTCCA  
AGCATAAGGATTCACGAAGGCTATGCATTAGGATAGCGAAAAATTTGGTGGAGGATGAGCGCTTATTGCA  
AAAACATAAGAAAAATAAGAATATACCTAGAAATGAGCTTAGAAAGCAGATTGGGGTGCATAACAAGACT  
ATTGGGAATAATAGAAAATACATTATAGCATTATGTTTGATTATGAGGGGAGATCTTCAGCTTTCACAGA  
AATATTTGCAGTATACCGATGAAGGGGGTAGGTAG

>A\_cellulolyticus\_WP\_010247809\_SigI3\_RsgI3\_Peptidase  
TTGCGTAATACTAAAATAACAGATATTAATGGGGCATATTCAGAAGATGCCGAAAAATTCGAATTTGCTT

CAAATCTAAAGATGATAAAAGAGGGAAATCAACAGGTAAGGGAAGAATTTATCGAAAAATATAAACCTTT  
TATCTTGAGAGTTACATCCATGACCTTAAACAAATATGTTGAGGCTCACCGAAGTGATGAGTTTAGTATT  
GCGTTGTCAGCCTTCAATGAGGCAGTTGACAGATTTAATTCGGGAAGCCGTAATAAATTTCTTTCCTATG  
CTGAAAAGGTAATTAGAAGCAGAATAATAGACTACTTGAGAAAAGGTAAGAGTGATAGCCAGCATGAAAG  
CTGGTCACTTGATTCTTCAAACGGTCTGGAGTTCGGCGAAGTGTATCAAGCATCCGATTTCGTATTCTCAG  
TTTGAGAGCATAGAAGATAGGGAAGAAATTGAAGAGCTTACGAAAAAATTATGGAATTTGGTATAACTC  
TTGATGAACTTGTGCTTAGTACACCAAGGCACAAAGATACTCGTGAACCTTGCATAAGTATAGCAGAAAT  
TCTACTTGAGGATAAGCCTATGCTTGAATTTTTACATAAAAAGTAAAAGTATTCCTAGAATTGAACTGGCT  
GAAAAAGCCCATGTTTCATGAAAATACCATTGGAAAGAACAGAAAATATATAATAGCTGTTTGCTTAATCC  
TAACAAGTGACCTTAATATATCAAAAAGGGTTTTAAAGTATGAATGTAAGTGA

>A\_cellulolyticus\_WP\_010247803\_SigI4\_RsgI4\_2xPA14  
TTGATATGTATTTTTGCTATCTATAGCTCCGAAACTAAGGACTTAGCCAATATTATTGAAAGAATCAAGG  
GGGAGATGATCAACTAAGGGAAAATTTCAATAAAGATTATATTCGGTTTATAGTCAAAGTACTCTCAAG  
TTCAGCAAAGAAAAAATTGATATAAGAAACAATGATGAATATAGTATTGGTTTTGATAGCATTTAATGAA  
GCTATTGAAAAATATGACAGAGATAGAAATAAAAAAGGATTTAACTTCTTTTCTTTTGCAGAGTTGATTA  
TTAAGAGAAGGGTAATCGACCACTTTAGACTTACATCAAAAAATATGGAAATGCCTTTTTCTGCTTTGA  
GACAGAGGATGAATGTTTTGAAGATAAATACCTTCAGGATGAGTTCGTGGACAAGATATGACAGGATCGAA  
GTTTTCCAGGAAATAAAGCATTACTCAAGTGTCTTAAAGAGCTTTAATATTGACATTAATGATTTGCACA  
AGTATACACCGAAACATAAGGATTCTATCAAGATGTGTGTTGATATTGGACGAAAAATTGCAGGGAAACAA  
GGATATTTATAATAAATTTATACAAAAGAAGTATTTCCCGATGAAGGATATTATGAAGCTCGTAAATGTG  
CATCCGAGTACAATAGAAAAAACAGGAAGTTTATAATTTCTGTTTGTATAATATATGAAATAACTATG  
AGTATCTAAAAACATACTTTAGTAGTGTTAGGTAG

>A\_cellulolyticus\_WP\_010248608\_SigI5\_RsgI5\_UNK  
TTGGGTTTTAAAATTCCTTTTCTTGCCAGAAGTCAAGCTGAAGGCGATGGCGTAAACGGTATTCTGGTTG  
AGATTAAGAGTGAAATACTCAACTTAAAGAGAAATTTATAAGCGATTATAAGCCATTTGTTATAAAGGC  
TGTTTTTAACGCGACCGGAAAGCGTGTGGAGGTTGAAAATAGTGAAGAGTATAGTATTGGCCTTTTGGCA  
TTTAACGAAGCAATAGACAGCTTTGATTTTTCAAAGAATAAAAACTTTTTCGGTTTTAGTGAGCAGGTAA  
TAAAACGTCGGATTATTGACTATTCCAGGAAAAACAGGGAAACACAAAATAAGGTATTTCCATTTACATA  
CTTTAGTGATGAACAGAGCAATGATTTTGAAGAAAGATATTTGACGTCAGATTTTACAAATGAGTTTAGC  
AATATAGAAGTAAAAGAAGATATATTGATTTTTAAAGATAAACTGAGACAGTACGGGATTTCTTTTCAGAG  
ATCTTTTACTTGTGCCCAAAACATAAGGATTCCAGAGTAATGTGTATAAGGATTGCAAGAGTTATAGC  
AAGAGATGAGAACTGCTTAACAAAATGAAAAAACTAAAACCTCTCCAATTCAAGAAGTCTGAAGGTT  
ATAAATGTGTACCGTGGAACACTTGAAAAAACCGCAAGTTTATAATTGCGCTCTGCGTGATTATGACCA  
GCAGTCTGGAAGTTATGAACGGCTATATAAGTCAAACCTGAGGAGGGAGGGGATGCAAATGTATAA

>A\_cellulolyticus\_WP\_010243057\_SigI6\_RsgI6\_CBM42  
ATGCTATTTATTTCAACTATTATAAATTATGCAGGCAAACTGCAACTCAAGTTATCGAAAAATCAAGA  
ATGGAGACAAGCAGCTAAAGGAAAAATTCATTGAAGACTATATTTCCATTTATACTAAAAGTTGTCTCAAG  
CTTCTATACCTCAAAAATGGTTGATTTGAAAAGCAGTGATGAATACAGCATTGGGCTAATGGCATTGAT  
GAGGCTATTGAAAAATATGATAGTAGCAAAAGCAGAAATTTTTTTAAATTTGCAGAAATGGTAATAAAAA  
GAAGGGTGATAGATTATTTTAAAAGACATCGTCTATCAGCAAAAATGAAATACCCTTATCATGTTTTGA  
TAGTAATATCGAAAGCGAGATTGAGGAGAACTAAGTATTTCTGACATTGGTTGGGAACTGATGGATAT  
GAATTTATTTATGAATTAAGGATTTTTCAAACAATTAGAAACCTTCGGACTAAATATAAATAATTTAC  
CTGATTATGTTCCGAAACATAAAGATTCAAGGCGTATGTGTGTAGGCATAGCAAAGAAGATTATTGAAAA  
TAAGAATATTTATGAAAAATTA AAAACTAAAAATATATCCATATGAAAGAAGTCAATTAAGTAATAGAT  
GTACATCCGAAGACTGTTGAAAGAAACAGGGCGTTTTATTATATGCTTATATATATTCTTGATAATGATT  
ATGAGAATTTTTAAAAATATTTAAACGAAATATTTTAG

>A\_cellulolyticus\_WP\_010250840\_SigI7\_RsgI7\_UNK

TTGTTAAATTTACAGCTATATAATAAGTTAATACACGAAAAAGAATCTTTAATAGAGATAATCAGAAAAA  
TTAAAAATGGCGATTTACTCTTGAGAAATAAGTTTATTGATGACTACAAACCTTTTATATTAAAATGTGT  
ATCACAAATAACCGGGAAGAAAAATAATCTGGTTCATAGTGATGAATATAGTATTGCACCTTATTGCCTTT  
AATGAAGCTATCGAATGCTATGATATAGAAAAGAAAAAGTATGTTTACGAAGTTTTCAAGCCAAGTGATGA  
AAAGGCGAATCATAGACTATATGAGAAGCACAAAGAAGAACGATATTACTTTGCCCTTTTCATATTTTTTC  
TGACTCTAGCAGTAGCGATTTTGAAGAAAAATACTTACATGATATCAGCTCTGACTATAGTGGCAGTTTT  
GATGTCAAAGAGGAAATCAAAAACCTTGAGTTAAAGATGCTTGAGTATAAAAATAACAATTGAAGACTTGA  
TATCTTGTCTCCTAAACATAATGATACAAGAAGACTATGTCTTAATGTTGCAAAAATTGTTCGTAGAAAA  
TGATTTGTTATACCAAATACTTCAAACAAACAAAACCTTACCATACAAAGAGCTTACTAAGCGAATTAAC  
CTGTGTCAAAGGACGTTGGAAAAAACAGAAAATTTATTATTGCTATGGTTTTTGTATTAAGAAGTGATA  
TGGATGTACTAAAAAATTATATAGCTGATACAATAGGAAGGTGA

>A\_cellulolyticus\_WP\_010252667\_SigI8\_RsgI8\_UNK  
GTGGACATGTGGATTTTGGGTGTGCATACACCCGAAAAGAGATCCTTTATCGATATATTGCATAAAATTA  
AAAATGGGGATAAGCTCCTGAAAGATAGGTTTATTAGTGATTATAGGCCATTTATTATTAAAATCCGTATC  
TAAGGTGCTTAATAATAAATTTATTGATATAGAAAATAGTGAAGAGTACAGTATTGGGCTGATTGCTTTT  
AATGAAGCTATTGAAAAGTATAATGAAGATAGGAAGTGCTCTTTTAAGAAATTTTCATATCAGGTTATAC  
AGCGAAGGCTGATTGATTACAGGAGAAAAACCAGAAGAGTTCTGTAGTCTATCCATTTTCGTATTTTTCGA  
AGGGGACGAAACATACGATTTTGAAGAAAAGTTTTTTAAGTCAGAGTATTCAGATCATGTATATAATTTT  
GAGATTCGTGAAGAGTTTTCTTCTTTTGTAAAGAAGATGGGCGATTTTGGAAATATCAATGAATGATCTTG  
TGAACACTATGCCCAAACATAAAGATTCTAGAAAAACATGTGTTAAAATAGCTAAGCATATAGTTGAAGA  
CGAAAATTTATATGACAAGCTTACTATAAAAAAGACAATTCATTTAAAAGCTTATCAAATATATAGAT  
GTAAGCCAACGAACTGTTGAACGAAATAGAAAATACATCATCGCATTGGTTCTAATTCTAAAGAGCGACT  
TGGATATAATAAAAAACTACATTAACATCTGGAATAA

>A\_cellulolyticus\_WP\_010681061\_SigI9\_RsgI9\_CBM3  
TTGGATGTCCGAAATCTTTTAAACTTTAACAAAAATAAAGTTATGGATAAACTTCTAACGACGAGTTCA  
TTTCCACATTAACAGATCAAGGAAGGCGACAGACTATTAAGAGAAGACTTTTTATCCAGATACACTCC  
TTTCATGTTGAAAGCTGCATCAAAGTTGCAGGTAGATATGTAGATATAAAAAATAGTGATGAGTACAGT  
ATTGCACTATCGGCATTTAATGAAGCAATAGATTGCTATGACATGACAAAAAACTATAACTTCCTTTTGT  
TTAGTGAACATGTTATAAGAAAACGGCTTATTGACCATATGAGAAAAGATAAGAGAAACAAGGAECTTC  
GTTTTCTACTTTGAGAACGACGATGAGATACTTGAAAATTATACAATCTTTGGTTTCGAATATCGGTTTT  
GAAGATGTTGAGGTAAGAGAAGATATTATTGAGTATAAGGAAGCTTTGGCAGATTTTGATATAACTTTTA  
TGGACTTGATAGCTAATGCGCAAAGCATGAAGATTCAAGAAAAGTGTGTATAAGAATTGCAAAAGTTCT  
TGCAGATGACGAAGAGTTATTTTCGGTTATTGCAAAAGTACAAGAATATTCGAGATCTGAGCTGAAGAAG  
AAGGCCAAGGTGCACAGCAGAACAATAGGAAATCATAGAAAGTATATTATTGCTCTGTGCTTGATTTTAA  
GAAGTAATCTTGAACCTTCCAAGAGTTACTTAAGTCTTACAGAGAAAGGAGGAAGCTGA

>A\_cellulolyticus\_WP\_010681295\_SigI10\_RsgI10\_UNK  
ATGCATTCAGTTACTATCAATGAGAGAGTTGAAAGTATCAAGAATGATGAATATAAGATCAACGAATTTA  
TTGAAGAGTATAAGCCTTTTATTGCTTCATGCGTTGAAAAGGCTATAGGGCATTATGTTGTTTATGGACA  
AGATGATGAATTGAGTATTGCTCTAATAGCTTTTGCAGAGGCAATAAAATCATTGACAGTTCAAGGGGA  
AATTTTCTTTCTTTTGCACAGAATGTTATAAAAAGGAGAATAATTGATTACTATCGTAAGGAGAAGAAGC  
ACAGTAAAACGGTTTTTCTGAACGAGTACTACAATGAAGAAGAAGAGGAAGAGCGCGACCTCACTGTTCGG  
CAAGGCACTTGATGAGTACTCAAAGAAGAAATCAGCGAATACAGAAGGCTTGAGATTGAACAGTTAAAA  
AAGGAGTTAGAAGATTGGGGAATATCATTTTTTGTAGTTGTCTGAAGTTTCTCAAAGCATGCAAAGACCA  
GGCGGATATACTCGGATATTGTAAAGTTTTTGTATTTTCGGATCAAGATTTATTAAGGCAGATAAGAAACA  
GAAGACTTTACCTATTATTGAAATCGAAAAAAGTCTTAAGATACCCCGAAAAAAGATAGATAGGGGACGA  
AAATATATATTAGCGGTATTAATAATTTGTACTGGTGATTATGAATTTATCAAGGATTACATAAGTTGGG  
GGTGA

>A\_cellulolyticus\_WP\_010246332\_SigI11\_RsgI11\_PA14\_CBM35

TTGCTGAAGTTTGGCGTCCGTAATAAAAATAGATTTAGATACTAAAAATCTATTGCAGAAATAGTTAAGA  
AAATTC AAGCAGGGGACAAAAACCTTAAGGAAGAACTAATTAGAGATAATATCCGCATATAACCAGAGT  
GGTTTCTAATATTGTTGGTACATACGTAGATAACAAAAATAGTGAAGAGTATAGTATTGGCTTGACTGCT  
TTTAATGAAGCAATAGATAAGTATGATGAAAAAGAAATGGTGATTTTTTTAAATATCCAATATGGTTA  
TAAAGCACAGAATTATAGACAAGAAAAGAAAGGATAAACGTCACAGTGATGTCTTGCCTCTTTCCTCCAT  
TGAAGATAATTGTAATTTGAGTTACCAACTTTCAACATCAAATTTCTTATAACCAGTTTGAGAAAATTGAG  
CTTAAGGAGGAACTATTAAGTTTGAAGTAGTTTGAATGAGTATGGTATTTCTATGCAGGATTTAATTA  
TAAGTTCTCCAAAACATGCTGATTCAAGAAGGCAATGCATCAAATTTGCAAGAATCATTGCTGAAGATGA  
ACAATTGTTTTTTAATATGGATAGAAAAGAAATGTATTCCACTTTCAGACTTGTTAAAAATGGTGAAAGTC  
AATCAAAAACAATTGTGAGGAATAGAAAAGTTTATAATTGCAGTAAGTTTAATTTTAAGAAGCAATCTGG  
ATGATTTGAAAGAGATGGTTACTCATACTGAAAGGAGGCAGCAATATGAATGA

>A\_cellulolyticus\_WP\_040428617\_SigI12\_RsgI12\_CBM3

ATGCTGAAATCCGATTACGATTCTACAAATGACATAGTAAAGAGAATACAAAATGGAGATTGGTTTTTAA  
AAGAAGAATTTATAAGTGATTATACTCCTTTTTATTTTTAAAAACAGTTGCCAGAATAACCGGAAAATACGT  
TGATATTGAAAACAGTGAAGAATATAGTATAGCGCTTATGGCTTTTGATGAAGCTATAAATTGTTTTGAT  
ATAGGCCAAAACAAGAGCTTTTTTAGGATTTAGCGACCTTGTTATAAATCGGAGAATCATAGACTATATAA  
GAAAAATCGGAAAATAAGAATGTGTTTCTTTTACCTACTTCGAATGTGAGTCAAACGAGGACTTTAA  
AGAAAAGTATATGCCTGAATACTTTGTAGGAAGGTTTGATAAATTTGAAATAAAGGAGGAAATTTTTTT  
TTTAAGGAAAAGCTGGCCACATTCGGAATAACCCTCGAAAATTTGGCGAAGAGTATACCAAAACATAAGG  
ACTCCAAAAGACTATGCATCAGAATAGCAAAAATAATAGCTAACGATACTGAGCTATACTATAAATTTAA  
TAAATCAAAGAATATACCAATGACTGATTTAATGAAATTTGGTTGATGTACATCATGTAACAGTAGAAAGA  
AATAGAAAATTCATAATTGCCGTCAGTCTAATAATAAATAGCGGCCTTGATGTCATTAAGAGTTACCTTC  
AGTTAACAGAGGATGGTGGGGGAGTATGA

>C\_termitidis\_EMS73161\_SigI1\_RsgI1\_UNK

TTGACTATTTTACATATATTTAATAAATCACGACAAAAACCCGAACCCCTTGAGAAATTATTAAAACTA  
TCAAAAATGGTGATCAGGAATTAAGGAACAAGTTTATTAATGATTACAACCCCTTTCATTATAAAGGTAGT  
TTCCAAGACCCTCGGCAAGTATGTAGATCTGGAGAATAGTGAAGAATACAGCGTCGGACTTCTTGCTTTC  
AATGAGGCCATAGATTGCTTTAACGAGAGCAAAAATGCCGGCTTCTTAAGGTTTGCCGAAACAGTCATTA  
AGAGGCGTCTTATAGATTATCAAAGAAAAAATTCAAAGTATGGCAAACCTTTCACCTTTCATATTTTGA  
GAGATATGACGAAGAAGAAAACGTGTTTTACGAAAACAAGTTTTTTACCCTTGATGCTTCTCCAGTTC  
AATAATATTGAAACAAAAGAAGAACTCGCAGCATTACCGAACGGCTTGCCCTCCTTTAACATTGAACTTA  
AGGAGCTTGTCAAGCTTGCGCCAAGCACATGGATTCCAAACGGCTGGCCATTAAGATAGCAAGAATACT  
TGCTCAGAGCAGGGAGCTTTCGGATAAACTTGAAAGAAAAAACAATTCCAATGGTGGAGCTTATGAAA  
TTACTGGATGTAAACCATAAAACCGTAGAACGGAACAGAAAATTTATAATTTCCGGTTTATATTATTCTTT  
GCAGCAGGCTTGAAACCCCTGCAAGGCTATATTGAGAACGTTGAGAGAGGAGGTAATGA

>C\_termitidis\_EMS71311\_SigI2\_RsgI2\_2xChBD3

TTGTCATTTTTTAATTCGTTGTTTCAGAAGTGAAAATACCATTGAAAATAAAATCGATAAGATACAAAAAG  
GCGATGAAATATTAAGAGAAATATTAATTCAGGAGTATGTACCGTTTTATTGTTAAACTGTTTCACAGAA  
GCTGGGAAGGTATGTTAGTATAGAGAATAACGAAGAGTTCAGTGTAGGGCTGTCTGCTTTTTAATGAGGCC  
ATAAACAGCTTCGATATCAAAAAGGGAAATAAATTTTTGGCATAACAGCAAAAAGGTTATTAACAGCAGGC  
TTATTGATTACTATCGAAATAGTAAAAAAACCAGGGATATTAAGTTTATCCATTTACATATTTTGATGA  
GGAAAAGTTTAATGCGTTAGAGAAGAGATATATGATGGATAATGCCGGCGAGCTGGAGAAAATTGAGACC  
GCTGACGAGATATCTTCATTTAAATTTGTGCCTGAGTGAATATGGTATAAATTTTGATGATCTGGTTTTAT  
TTTCTCCCAAACACAAGGATTCATCAGACAGTGTGTAATAATCGCAAGAATGATAACGGATAACGATAG  
ACTATACGACATGATGACAAAAAGAAAGCCATACCATTAAATGAATTAATGAAAATAGCTGATGTACAT  
CGCAGAACTATAGAGAGAAACAGAAAATTCATCATAACGACGTGTCTTATCATAAGGAGTGACCTCGATG  
TTTTGAAAGCCTATGTGATGAGTGTAGAGGAAGGAGGGACGCTCAATGCATAA

>C\_cellobioparum\_WP\_027630760\_SigI1\_RsgI1\_UNK

TTGACTATTTTACATATATTTAATAAATCACGACAAAAACCCGAACCCCTTGGAGAAATTATTA AAACTA  
TCAAAAATGGTGATCAGGAATTAAGGAACAAGTTTATTAATGATTACAACCCTTTCATTATAAAGGTAGT  
TTCCAAGAACCTCGGCAAGTATGTAGATCTGGAGAATAGTGAAGAATACAGCGTCGGACTTCTTGCTTTC  
AACGAGGCAATAGATTGCTTTGACGAGAGCAAAAATGCCGGCTTCTTAAGTTTGGCCGAAACAGTCATTA  
AGAGGCGTCTTATAGATTATCAAAGAAAAAATTCAAAGTATGGCAAAACCTTTCCACTTTCATATTTTGA  
GAGATATGACGAAGAAGAAAACGTGTTTTACGAAAACAAGTTTTTTACCGTTGATGCTTCCCTCCCAGTTT  
AATAATATTGAAACAAAAGAAGAACTTGCAGCATTTCGCCAAACGGCTTGCATCCTTTAACATCGAACTTA  
AGGAGCTTGTGAGGCTTGTCCCAAGCACATGGATTCCAAACGGCTGGCCATTAAGATAGCAAGAATACT  
TGCTCAGAGCAGGGAGCTTTTCGGATAAACTTGAAAGAAAAAAAACAATTCCAATGGTGGAGCTTATGAAA  
TTACTGGATGTAAATCATAAAACCGTAGAACGGAACAGAAAATTTATAATTTTCGGTTTATATTATTCTTT  
GCAGCAGGCTTGAAACCCTGCAAGGCTATATTGAGAACGTTGAGAGAGGAGGTAAGTGA

>C\_cellobioparum\_WP\_027627335\_SigI2\_RsgI2\_2xChTBD3

TTGTCATTTTTTAATTCGTTGTTTCAGAAGTGAAAATACCATTGAAAATAAAATCGATAAGATACAAAAG  
GTGATGAAATATTAAGAGAAATATTAATTCAGGAGTATATACCGTTTATTGTTAAAACGTTCACATAA  
GCTGGGAAGGTATGTTAGTATAGAGAATAACGAAGAGTTCAGTGTAGGGCTTTCTGCTTTTAAATGAGGCC  
ATAAACAGCTTCGATATCAAAAAGGGAAATAAATTTTTTGGCATAACAGCAAAAAGGTTATTAACAGCAGGC  
TTATTGATTACTATCGAAACAGTAAAAAAACCAGGGATATTAAGTTTATCCATTTACATATTTTGATGA  
GGAAAAGTTTAAATGCGTTAGAGAAGAGATATATGATGGATAATGCCGGCGAGCTGGAGAAAATTGAGACC  
GCTGACGAGATATCTTCATTTAAATTGTGCCTGAGTGAATATGGTATAAATTTTGATGATCTGGTTTTAT  
TTTCTCCCAAACACAAGGATTCCATCAGACAGTGTGTAAAAATCGCAAGAATGATAACGGATAACGATAG  
ACTATACGACATGATGACAAAAAAGAAAGCCATACCATTAAATGAATTAATGAAAATAGCTGATGTACAT  
CGCAGAACTATAGAGAGAAACAGAAAATTCATCATAACGACGTGTCTTATCATAAGGAGTGACCTCGATG  
TTTTGAAAGCCTATGTGGTGTAGTAGAGGAAGGAGGGACGCTCAATGCATAA

>B\_subtilis\_CAB13218\_SigI\_RsgI\_UNK

GTGAAACCAGTGCTTAGCCTTTTGTTTAAATTTGGGAAAAAGAAGCAAACACTTGAAAAAGCTGTTGAGA  
GTATACAAAAGGCAATAAAGATCTGCAAATGAATTAATACAGCAATATAAGCCATTTATCGCAAAGAC  
GGTTTCATCCGTTTGTAAACGATATATAGATGAAAAGACGATGAGTTCAGTATTGGACTGATCGCGTTT  
AATGAAGCTATAGAAAATATTCACCTGAAAAGGAAATTCCTCTGCTCGCATTTGCTGAGCTTATTATAA  
AAAGAAAAGTCAATTGATTACATTAGAAAAGAAGCCAGAAGCGCACAAAATATAAATATCGATTTACAGGA  
AGGAGACGATCAGGAGTCATCACAAAGCCTGATTGAAGCCGAGCTTTCCATTGATGAATACCGCCGTCAG  
ATTGAACAGGAGCAGAGGCGGGAGGAAATCCTCTATTTTCAAAGCAGCTCAAGGATTATGGTTTATCGT  
TTAAAGAACTGCTTGAAAATTCCTCAAACACACGGATGCAAGGCAAAACGCCATAAAGGTGGCAATGAC  
GCTTGTTGAACATGAAGAATTGGCCGCTATCCTGTATACAAAGAAGCAGCTTCCGGTCAAACAGCTTGAA  
CAGCTTGTCTCTGTAAGCCGAAAACGATTGAGAGAAACAGAAAATATATTATTGCGATGTGTATTATCA  
TTACGGGTGATTATATTTATTTAAAGATTATCTTAAAGGGGTGCTGCACTCATGA

>B\_licheniformis\_AAU23045\_SigI\_RsgI\_UNK

GTGAAACCAGTGCTTAGCCTTTTGTTTAAGACAGGAAAAAGGAAACAATCATTAGAAGAGTCTGTAATAA  
GCATACAAAAGGAAATCAGCAGTTGCAAACGAGCTTATCGATCAATATAAGCCTTTTGTGGCTAAAAC  
GGTTTCATCCGTTGTGCAAACGATATATAGATGAAAAGATGATGAATTCAGCATCGGCTTGATTGCATTC  
AATGAAGCCATTGAAAAATATTCCTTCAGATAAAGGAAATTCCTCTGCTTGCATTTGCAGAGCTGATCATA  
AGCGCAAAGTCAATTGATTATATCAGAAAAGAAGCGAGAAATGCCAGAACATCAATATGGACATGCAAGA  
AGGAGAAGAACAGGAATCCTCCCAAAGCATGATTGAAGCGGAGCTTTCCATTGATGAATTC AACCCGCATG  
CTCGAACAGGAGCAAAGGCGGGAGGAGATTCTCCATTTTAAAGAAAGGCTTAAAAGTTTTTGGCCTGTCTT  
TTTCCGATTTGCTGGAGCATTCCCCGAAACATACGGATGCAAGGCAAAACGCCATCAAAGTGGCATATAC  
GCTTGTGCAACATGAAGAATTA AAAAAGATCTTGTTTGAAAAGAAGCAGCTTCCCGTCAAACAGCTTGAA  
AAGCTTGTGGCTGTCAGCAGAAAACCGTAGAGAGAAAACCGCAAATATATCATCGCTATGGCGATCATT  
TAACGGGCGATTATGTTTACCTTAAAGATTATCTAAAAGGGGTGCTCAATTCATGA

>B\_thuringiensis\_serovar\_israelensis\_EA054463\_SigI\_RsgI\_UNK

TTGAAGGAGGCTGGGAGATTACAAGTGTGAGTTTAGTAATGAAGATCTTAAGAAAACCGAAAATAGAAG  
ATATCGTATGTAACATACAAAACAACGAAGAAGACAAAGAAGCGTTTATCGTACAGTATCAGCCTTTTAT  
TAGAAAATCAATCTCATCTGTCTGCCGCCGATATATAACAGAACAGGATGATGAATATAGCATTGGATTG  
TTTGCCTTTAACGAAGCAATTGAACAGTATTTCATATACAAAAGGAAAATCCTTTTTAGCGTTTGCTGATC  
TTCTTATAAAAAGAGATGTAATTGACTATATACGTAAGGAGTCTAAACATAACTTTGTCTTTTTAAAAGA  
AGATGAGCAAGAGGAAAATGTTAGAAATGCAAGTATCGCTTACGGAGTATATGAAAGAGATGGAAAATAGT  
AACCGTAAGGAGGAAATCTTCATTTTCAAAGTGTGCTAGCTGAGTTTAAAATCACATTCTCAGAGCTTG  
CTAAAGAATCTCCTAAGCATCGTGATACACGTGAGCACTTAATAGAAATTGTAAAAATTATTATAAAAAGA  
AGAGGAAATGATGGAAGAGCTGTTCCGAAAGAAAAAGTTACCGCTTAAACATATAGAACCACGTGTTAGG  
GTAAGTCGTA AACGTTGGAACGACATAGAAAATACATTATTGCAATGTGTATTATTTTTGCAAACAACT  
ATACATATATTCTGGATTACATAAGAGGGGAAAAGCATGATGAATAA

>B\_sp\_NRRL\_B14911\_EAR65026\_SigI\_RsgI\_UNK

ATGCTCGGTTATTTATTCATCACTAAGAAAAACAGACACTAGAAAAACCGTAATAAAAATCCAGCAGG  
GCGACAGCCGGCTGCTTAATGAACTGATAGAGTCATACAAACCTTTTATTGCAAAAACCGTATCCTCCGT  
CTGCAGACGCTATATCCATGAGTCTGATGATGAGTACAGCATCGGGCTGATTGCCTTTGATGAAGCGGTC  
CGTAAATACAGTCCCAGAGAAGGGCAGTTCCTCCTGGGATTTGCCGAAATCATAATCAAGCGAAGGGTCA  
TTGATTATATCAGGCAGCAGGCAAGGCATATGAATGTCAGCTTTGAAGGCAGCAGTGGAAGTGCTGATGA  
ACAAGCTTCAGCCAGTCTTGTGGAAGACAGGCTGTCGATTGAAGAGTTCGTGAAAAAACAGAGCAAGAG  
CTTAGACGGGATGAAATCATTCACTTTACAGCTCTTCTCAAAGAATATGGATTAACCTTTTGCTGAAATTG  
CAGATCAGTCCCCAAAACATGCAGATGCGCGGAAAAATGCGATGGAAATAGCATCGGCACTTGTGAGGGA  
CAAAGAGCTGGCTTCCTATTTGCAGGAAAAAAGCGCCTTCCCATCAAGCAGCTGGAAGGCACTGCAGCA  
GTGAGCAGAAAAACGATTGAAAGGAACAGGAAGTATATCATTGCTGTTTCCCTTATTTTAAATGGGAGATT  
ATGTGTATTTACAGGAGTATATAAAGGGGTGCTGAAAACGTGA

>B\_tequilensis\_KOS72324\_SigI\_RsgI\_UNK

GTGAAACCAGTGCTTAGCCTTTTGTTTAAATTGGGAAAAAGAAGCAAACACTTGAAAAAGCTGTTGAGA  
GTATACAAAAGGCAATAAAGATCTGCAAATGAATTAATACAGCAATATAAGCCATTTATCGCAAAGAC  
GGTTTCATCCGTTTGTAAACGATATATAGATGAAAAAGACGATGAGTTCAGTATTGGACTGATCGCGTTT  
AATGAAGCTATAGAAAAATATTCACCTGAAAAAGGAAATCTCTGCTCGCATTTGCTGAGCTTATTATAA  
AAAGAAAAGTCATTGATTACATTAGAAAAGAAGCCAGAAGCGCACAAAATATAAATATCGATTTACAGGA  
AGGAGACGATCAGGAGTCATCACAAAGCCTGATTGAAGCCGAGCTTTCATTGATGAATACCGCCGTCAG  
ATTGAACAGGAGCAGAGGCGGGAGGAAATCCTCTATTTTCAAAGCAGCTCAAGGATTATGGTTTATCGT  
TTAAAGAAGTCTTGAATTTCTCAAAGCACACGGATGCAAGGCAAACGCCATAAAGGTGGCAATGAC  
GCTTGTTGAACATGAAGAATTGGCCGCTATCCTGTATACAAAGAAGCAGCTTCCGGTCAAACAGCTTGAA  
CAGCTTGTCTCTGTAAGCCGAAAAACGATTGAGAGAAACAGAAAATATATTATTGCGATGTGTATTATCA  
TTACGGGTGATTATATTTATTTAAAGATTATCTTAAAGGGGTGCTGCACTCATGA

## References

1. Muñoz-Gutiérrez,I., Ortiz de Ora,L., Rozman Grinberg,I., Garty,Y., Bayer,E.A., Shoham,Y., Lamed,R. and Borovok,I. (2016) Decoding Biomass-Sensing Regulons of Clostridium thermocellum Alternative Sigma-I Factors in a Heterologous Bacillus subtilis Host System. *PLoS One*, **11**, e0146316.
2. Radeck,J., Kraft,K., Bartels,J., Cikovic,T., Dürr,F., Emenegger,J., Kelterborn,S., Sauer,C., Fritz,G., Gebhard,S., *et al.* (2013) The Bacillus BioBrick Box: generation and evaluation of essential genetic building blocks for standardized work with Bacillus subtilis. *J. Biol. Eng.*, **7**, 29.
3. Ortiz de Ora,L., Muñoz-Gutiérrez,I., Bayer,E.A., Shoham,Y., Lamed,R. and Borovok,I. (2017) Revisiting the Regulation of the Primary Scaffoldin Gene in Clostridium thermocellum. *Appl. Environ. Microbiol.*, **83**, e03088-16.
